# Supplementary material for: MARCH1 regulates insulin sensitivity by controlling cell surface insulin receptor levels
Source: PubMed Central journal article supplement (PMC5013666; doi:10.1038/ncomms12639), 2016-08-31
Supplement: ncomms12639-s1.pdf [file ncomms12639-s1.pdf]

## Supplementary Fig. 1

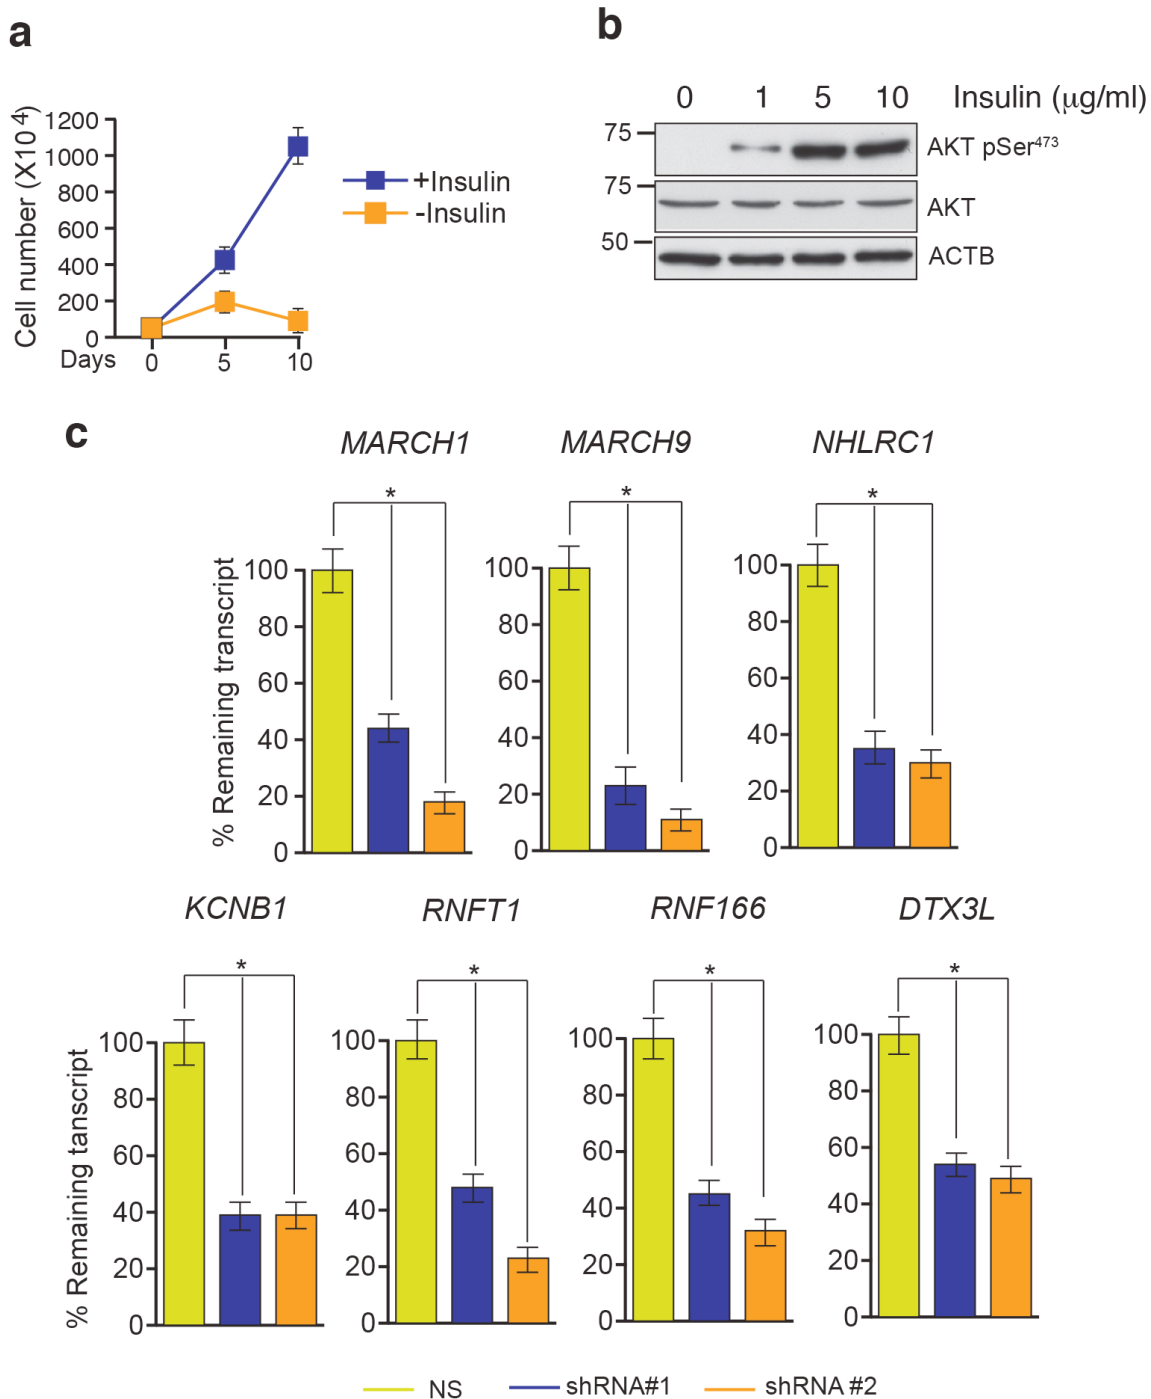

**Supplementary Figure 1. HeLa cell survival, insulin signaling, and knockdown efficiency of identified candidates.** (a) Cell proliferation, calculated using Trypan blue exclusion (n=3), for HeLa cells grown in serum free DMEM containing growth factors without insulin or 5  $\mu\text{g/ml}$  insulin at days 5 and 10. (b) Insulin stimulation of AKT Ser<sup>473</sup> phosphorylation. HeLa cells were serum starved overnight and then stimulated with indicated concentrations of insulin for 30 mins. (c) cDNA from HeLa cells expressing indicated shRNAs was analyzed by qRT-PCR (n=3). Knockdown efficiency relative to non-specific (NS) shRNA is shown. \* compares NS shRNAs against indicated shRNAs. Data are mean  $\pm$  SEM. In all panels, \* $P < 0.05$ , comparisons by *t*-test.

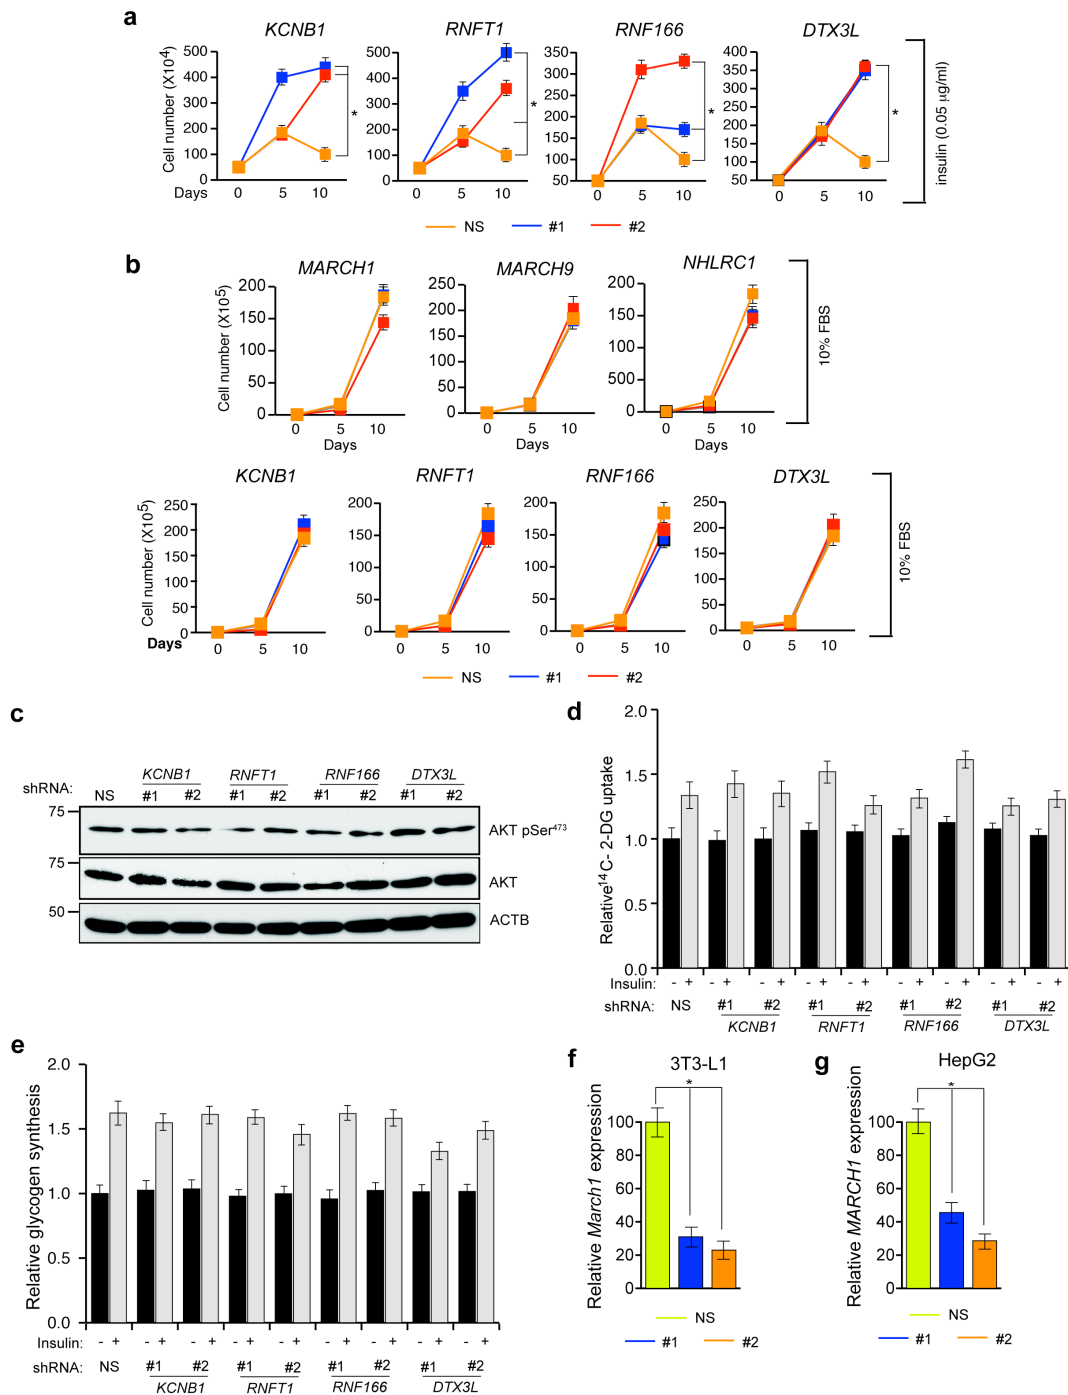

**Supplementary Figure 2. Validation of candidates identified from the large-scale RNAi screen. (a)** Relative cell number ( $n=3$ ), calculated using Trypan blue exclusion, for HeLa cells expressing indicated shRNAs and grown in low-insulin medium at day 5 and 10. \* compares NS and *MARCH1* shRNAs at day 10. **(b)** Relative cell number ( $n=3$ ), calculated using Trypan blue exclusion, for HeLa cells expressing indicated shRNAs and grown in 10% serum-supplemented medium at days 5 and 10. **(c)** Immunoblot analysis of AKT Ser<sup>473</sup> phosphorylation in HeLa cells expressing the indicated shRNAs. **(d)** Relative <sup>14</sup>C-2-deoxyglucose (2-DG) uptake ( $n=4$ ) in HeLa cells expressing the indicated shRNAs. **(e)** Relative glycogen synthesis ( $n=3$ ) in HeLa cells expressing the indicated shRNAs. **(f)** 3T3-L1 cells expressing *March1* or non-specific (NS) shRNA were analyzed for knockdown efficiency using qRT-PCR ( $n=3$ ). **(g)** HepG2 cells expressing *MARCH1* or non-specific (NS) shRNA were analyzed for knockdown efficiency using qRT-PCR ( $n=3$ ). Data are mean  $\pm$  SEM. In all panels, \* $P<0.05$ , comparisons by *t*-test.



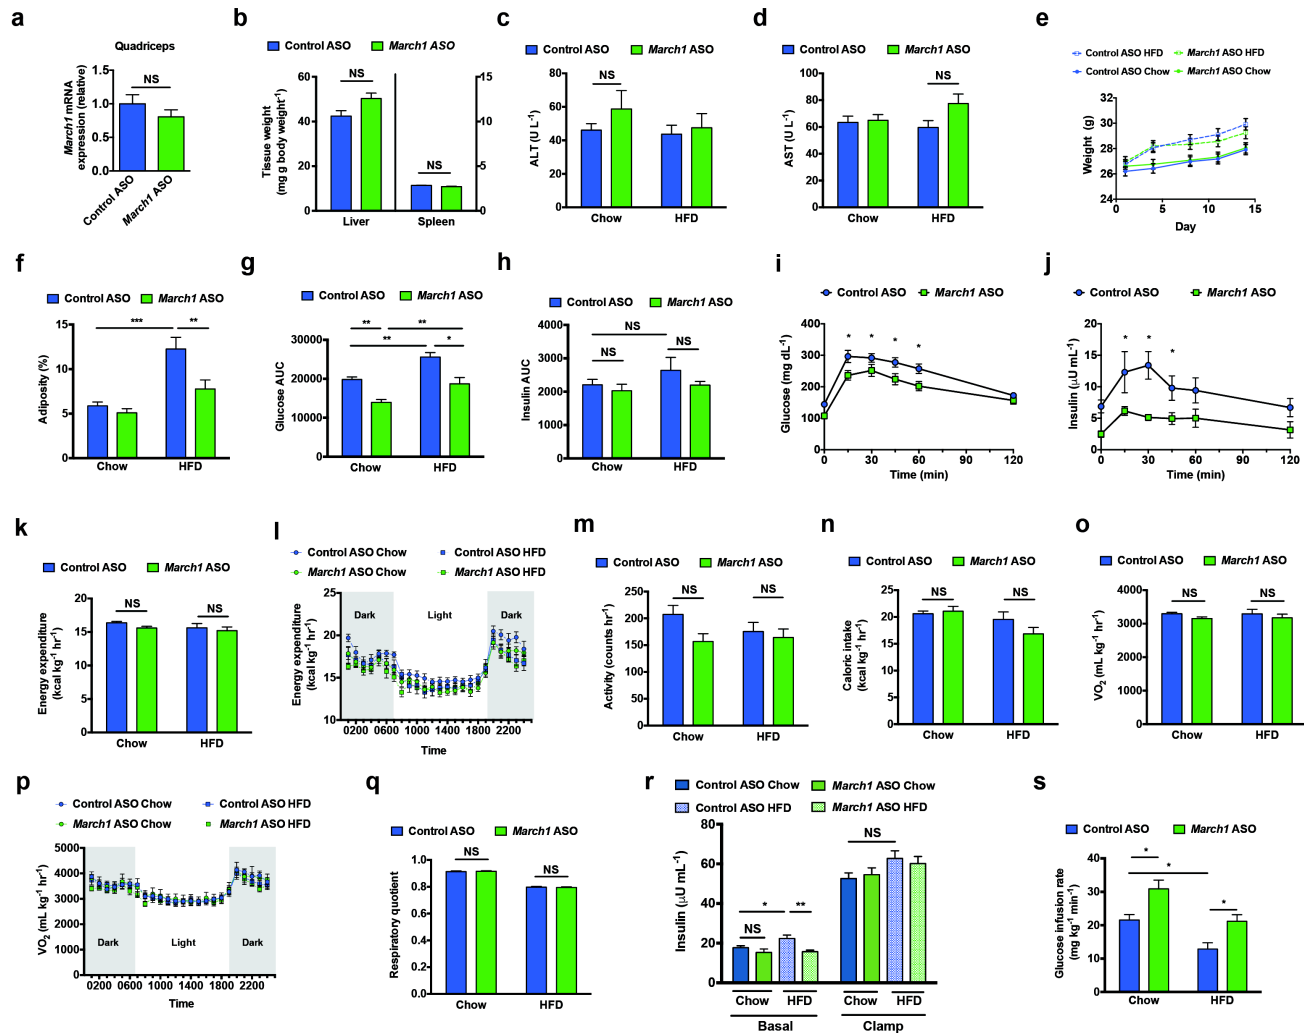

**Supplementary Figure 3. Studies of male mice treated with *March1* ASO.** (a-h) Mice were treated for two weeks with ASO and fed regular chow or HFD as indicated. (a) *March1* mRNA expression in quadriceps muscle. (b) Liver and spleen wet weight. (c) Plasma alanine transaminase (ALT) activity. (d) Plasma aspartate transaminase (AST) activity. (e) Body weight during ASO treatment. (f) Adiposity after ASO treatment measured by <sup>1</sup>H NMR. (g) Plasma glucose area under the curve during intraperitoneal glucose tolerance tests (ipGTTs) for data plotted in **Fig. 3b**. (h) Plasma insulin area under the curve during ipGTTs for data plotted in **Fig. 3c**. (i-j) Mice were treated with ASO for four weeks and fed regular chow. (i) Plasma glucose excursions during ipGTTs. (j) Plasma insulin excursions during ipGTTs. (k-r) Mice were treated with ASO for two weeks and fed chow or HFD as indicated before metabolic cage studies. (k-l) Whole-body energy expenditure. (m) Locomotor activity. (n) Caloric intake (o-p) Whole-body oxygen consumption. (q) Respiratory quotient. (r-s) Mice were treated with ASO for two weeks and fed regular chow or HFD as indicated before hyperinsulinemic-euglycemic clamp studies (see also **Fig. 3d-h**). (r) Plasma insulin levels before and during the clamp. (s) Mean glucose infusion rates during the steady-state period of the clamp for data plotted in **Fig. 3d**. Data are mean ± SEM. In all panels, \**P*<0.05, \*\**P*<0.005, \*\*\**P*<0.0005. In (a-c), *n* = 6-7 mice per group; comparisons by two-way ANOVA. In (e), *n* = 12-19 mice per group; comparisons by two-way ANOVA. In (f), *n* = 18-23 mice per group; comparisons by two-way ANOVA. In (g-h), *n* = 5-8 mice per group; comparisons by two-way ANOVA. In (i-j), *n* = 8-9 mice per group; comparisons by two-tailed unpaired *t*-test. In (k-q), *n* = 15-16 mice per group (regular chow) and 6-7 mice per group (HFD); comparisons by two-way ANOVA. In (r-s), *n* = 9-11 mice per group; comparisons by two-way ANOVA.

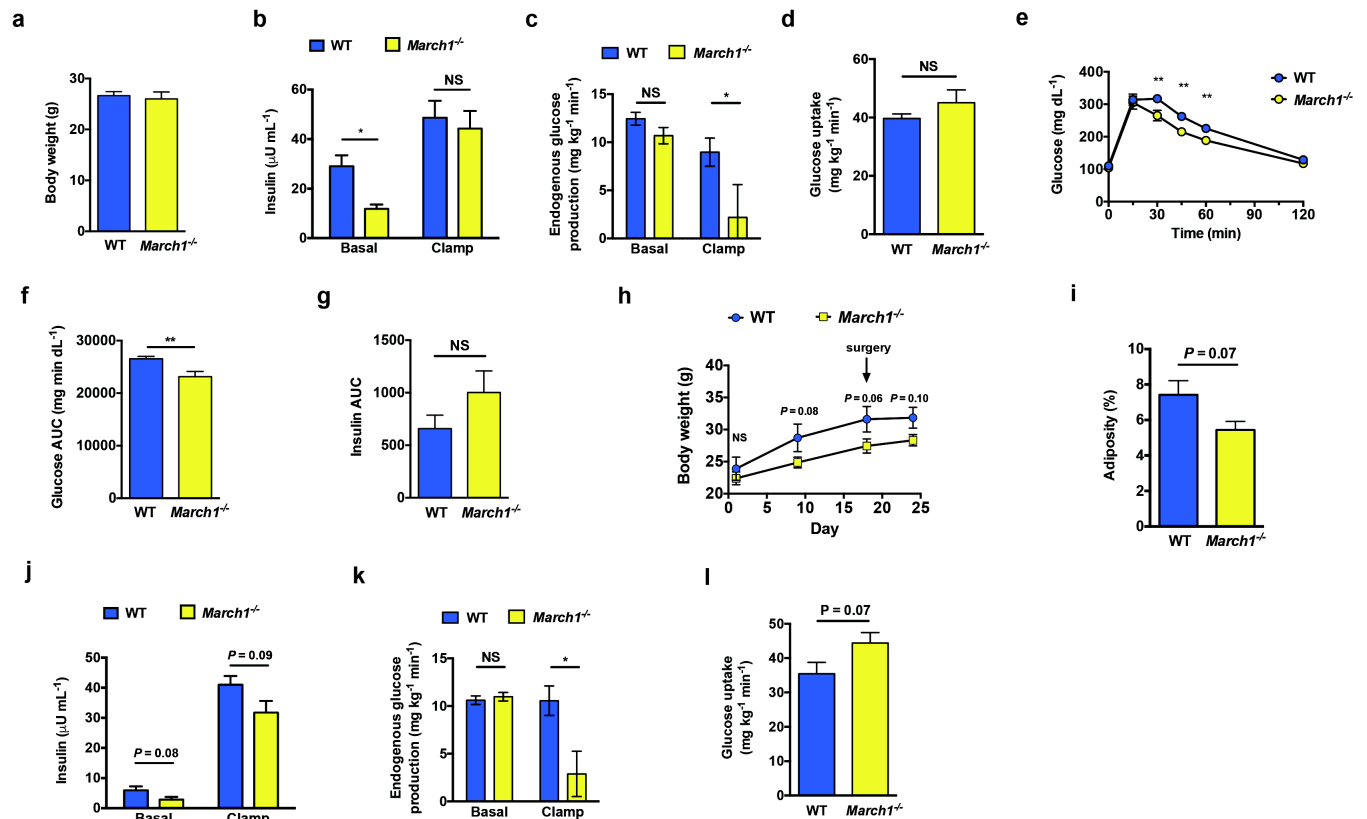

**Supplementary Figure 4. Metabolic phenotyping of *March1*<sup>-/-</sup> mice.** Littermate wild-type control mice were used in all studies of *March1*<sup>-/-</sup> mice. Different insulin infusion rates were used for studies of chow-fed and HFD-fed mice (2 mU kg<sup>-1</sup> min<sup>-1</sup> and 3 mU kg<sup>-1</sup> min<sup>-1</sup>, respectively), so data are not superimposed. **(a-d)** Hyperinsulinemic-euglycemic clamp studies were performed in chow-fed male mice (see also **Fig. 4a-c**). **(a)** Body weight. **(b)** Fasting and clamped plasma insulin concentrations. **(c)** Basal and clamped endogenous glucose production (EGP). **(d)** Whole-body glucose uptake during the steady-state period of the clamp. **(e-g)** Intraperitoneal glucose tolerance tests were performed in chow-fed female mice. **(e)** Plasma glucose excursions. **(f)** Plasma glucose area under the curve (AUC). **(g)** Plasma insulin AUC. **(h-l)** Hyperinsulinemic-euglycemic clamp studies were performed in HFD-fed mice (see also **Fig. 4d-f**). **(h)** Body weight during high-fat feeding. **(i)** Whole-body adiposity measured by <sup>1</sup>H NMR. **(j)** Fasting and clamped plasma insulin concentrations. **(k)** Basal and clamped EGP. **(l)** Whole-body glucose uptake during the steady-state period of the clamp. Data are mean ± SEM. In all panels, \**P*<0.05, \*\**P*<0.005; comparisons by two-tailed unpaired *t*-test. In **(a-d)**, *n* = 10 WT and 5 KO mice. In **(e-g)**, *n* = 11 mice per group. In **(h-l)**, *n* = 5 mice per group.

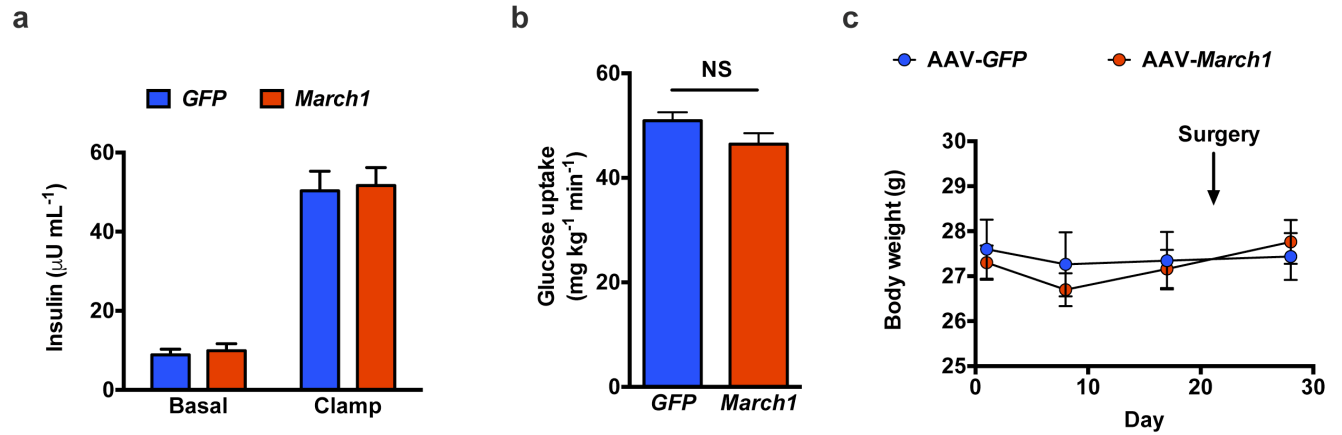

**Supplementary Figure 5. Hyperinsulinemic-euglycemic clamp studies in mice treated with AAV-*March1*.** Male 12-week old C57BL/6J mice were injected intravenously with AAV four weeks before study and fed regular chow. Hyperinsulinemic-euglycemic clamps were performed (see also **Fig. 5**). **(a)** Plasma insulin levels before and during the clamp. **(b)** Whole-body glucose uptake during the steady-state period of the clamp. **(c)** Body weight during treatment. Data are mean  $\pm$  SEM. In all panels,  $*P < 0.05$ .  $n = 7-9$  mice per group; comparisons by *t*-test.

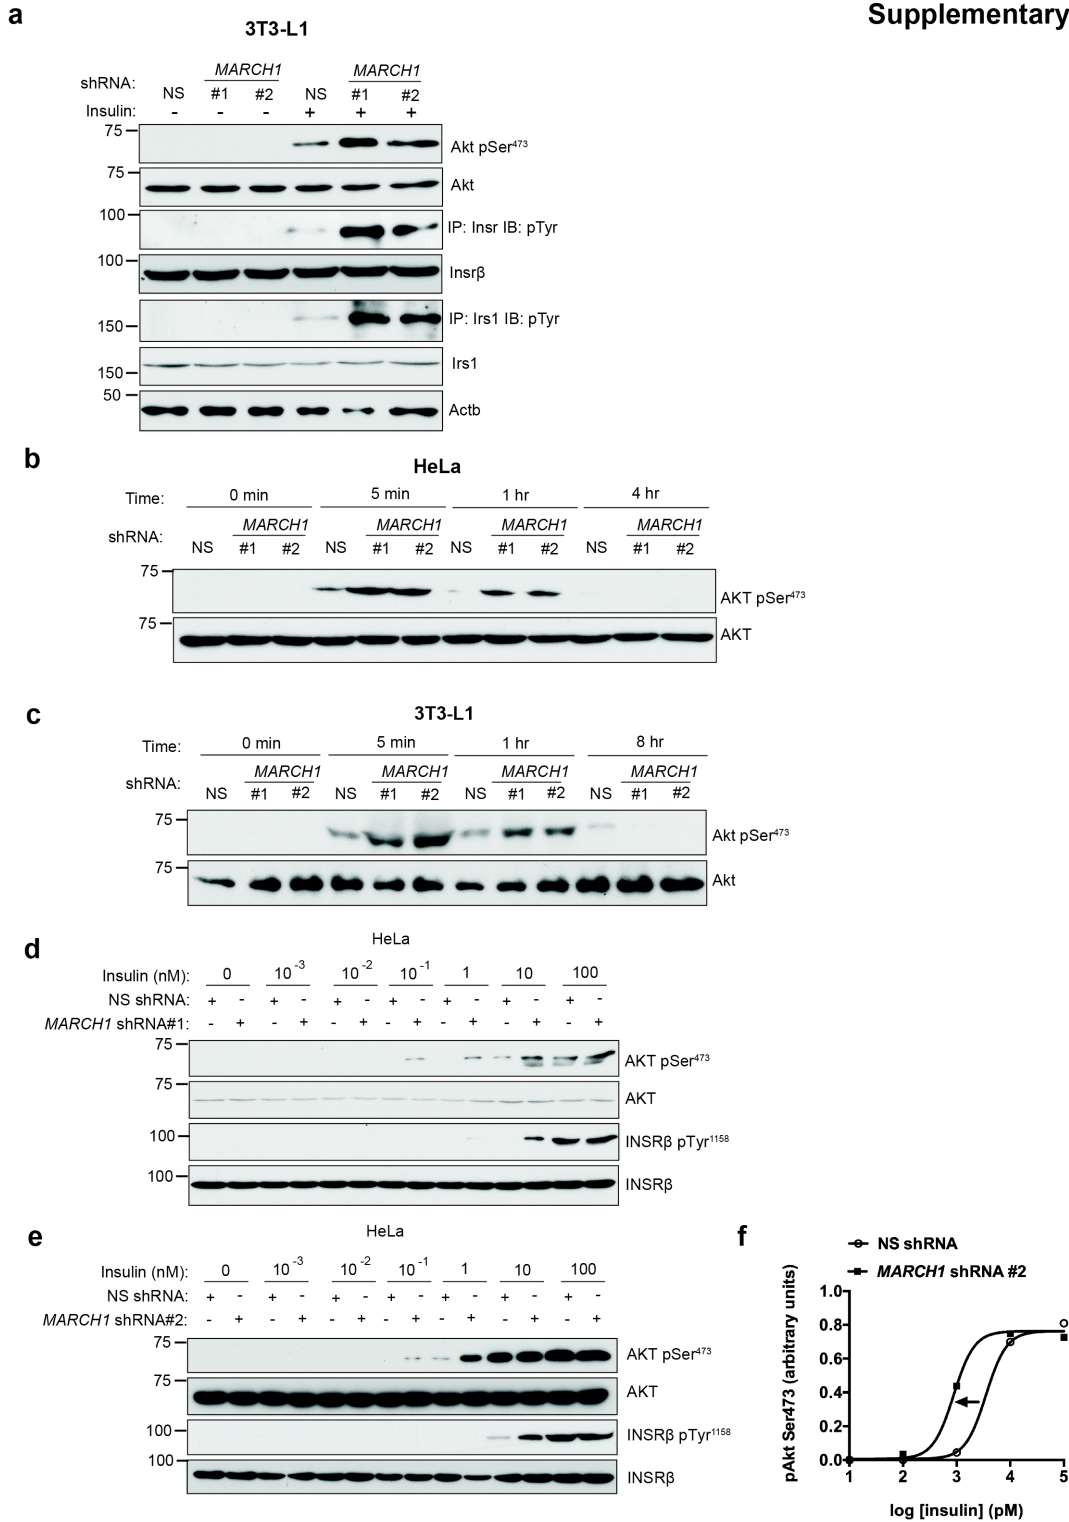

**Supplementary Figure 6. Increased INSR signaling in cells with *MARCH1* knockdown. (a)** Immunoblot analysis of insulin-stimulated INSR, IRS-1, and AKT activation in 3T3-L1 cells expressing the indicated shRNAs. **(b-c)** Insulin stimulation time course studies. HeLa cells **(b)** or 3T3-L1 cells **(c)** expressing the indicated shRNAs were serum starved overnight and stimulated with insulin (0.05  $\mu\text{g}/\text{mL}$ ) for the indicated duration. AKT Ser<sup>473</sup> phosphorylation was assessed by immunoblotting. **(d-e)** Insulin dose-response studies. HeLa cells expressing the indicated shRNAs were serum starved overnight and stimulated with insulin at the indicated concentration for 30 min. AKT Ser<sup>473</sup> and INSR Tyr<sup>1158</sup> phosphorylation were assessed by immunoblotting. **(f)**. Quantitation of the immunoblots in **(e)** fitted to insulin dose-response curves. See **Fig. 7c** for quantitation of the immunoblots in **(d)**.

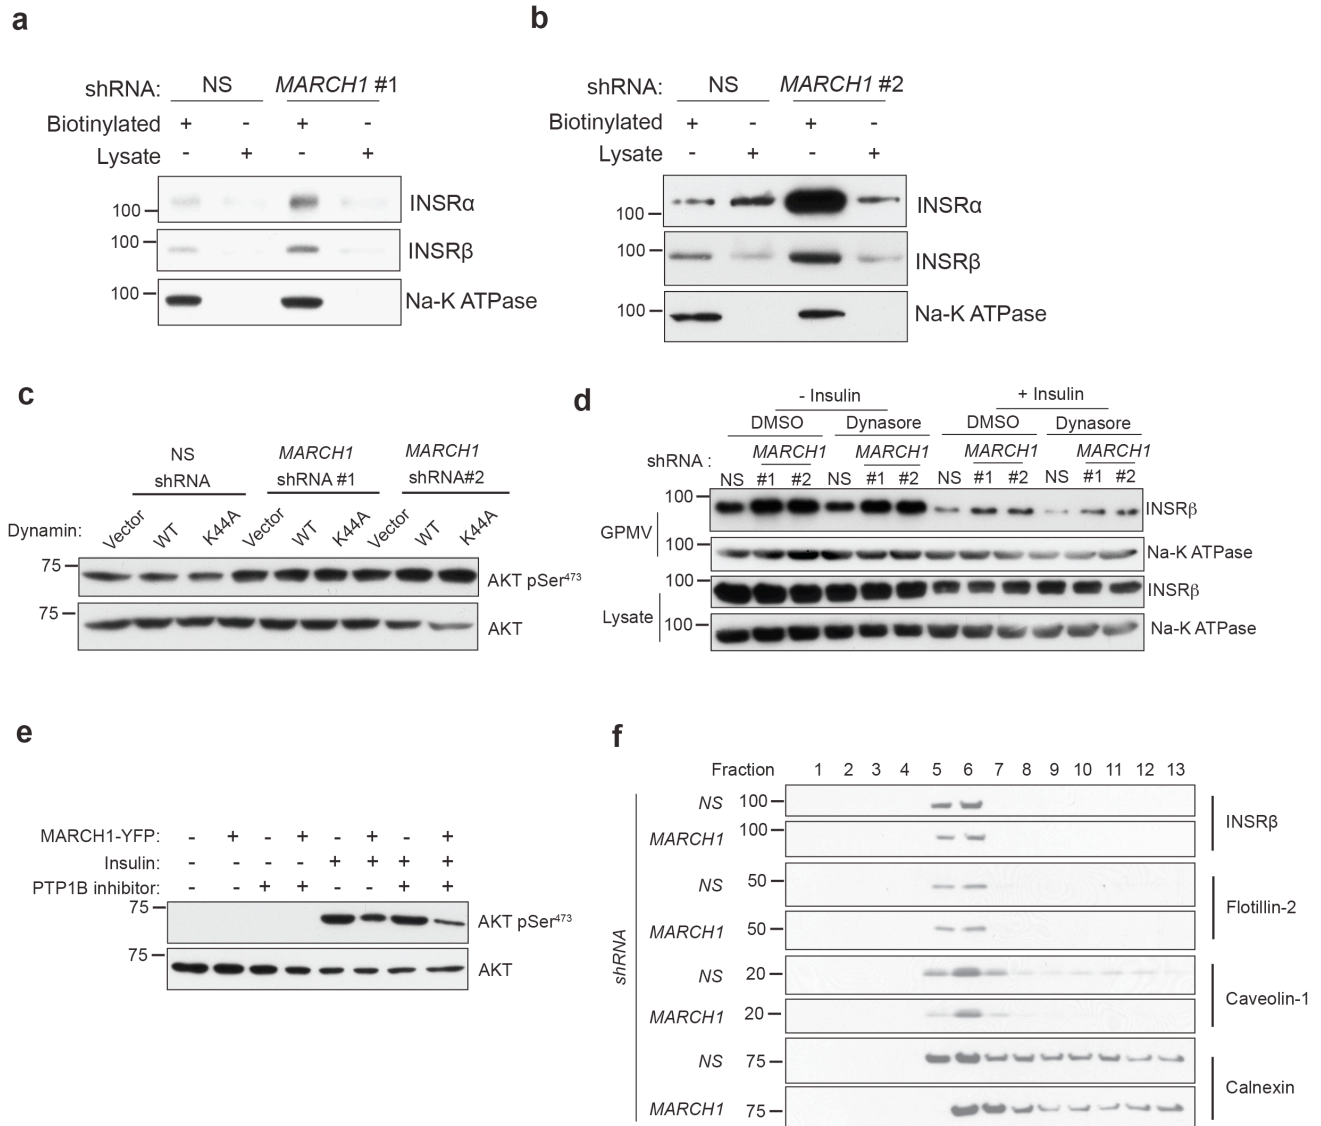

**Supplementary Figure 7. *MARCH1* regulates cell surface INSR expression without altering endocytosis, PTP1B activity, or membrane microdomain INSR content. (a-b)** HeLa cells expressing the indicated shRNAs were serum starved and surface proteins were biotinylated. Avidin-isolated cell surface proteins and whole cell lysates were analyzed for the indicated proteins. See **Fig. 7d** for quantitation of multiple biotinylation experiments using *MARCH1* shRNA #1. **(c)** HeLa cells expressing indicated shRNAs were transfected with either empty vector (Vector), wild-type dynamin (WT) or endocytosis-defective K44A dynamin (K44A) and analyzed for AKT Ser<sup>473</sup> phosphorylation. **(d)** HeLa cells expressing the indicated shRNAs and treated with or without the dynamin inhibitor Dynasore (20  $\mu$ M) were harvested before or after 3 hr stimulation with 5  $\mu$ g/ml insulin. Immunoblot analysis of INSR $\beta$  in GPMVs or whole cell lysate was performed. Na-K ATPase is shown as a loading control. **(e)** HeLa cells were serum starved overnight and then stimulated with 0.05  $\mu$ g/ml insulin. Samples were collected after 30 minute of insulin stimulation, either in the presence of DMSO or PTP1B inhibitor (C<sub>26</sub>H<sub>19</sub>Br<sub>2</sub>N<sub>3</sub>O<sub>7</sub>S<sub>3</sub>) (10  $\mu$ M). **(f)** Lipid rafts and caveolae were isolated by sucrose gradient fractionation from HeLa cells expressing the indicated shRNAs and were analyzed for marker proteins and INSR $\beta$  by immunoblot analysis.

Supplementary Fig. 8

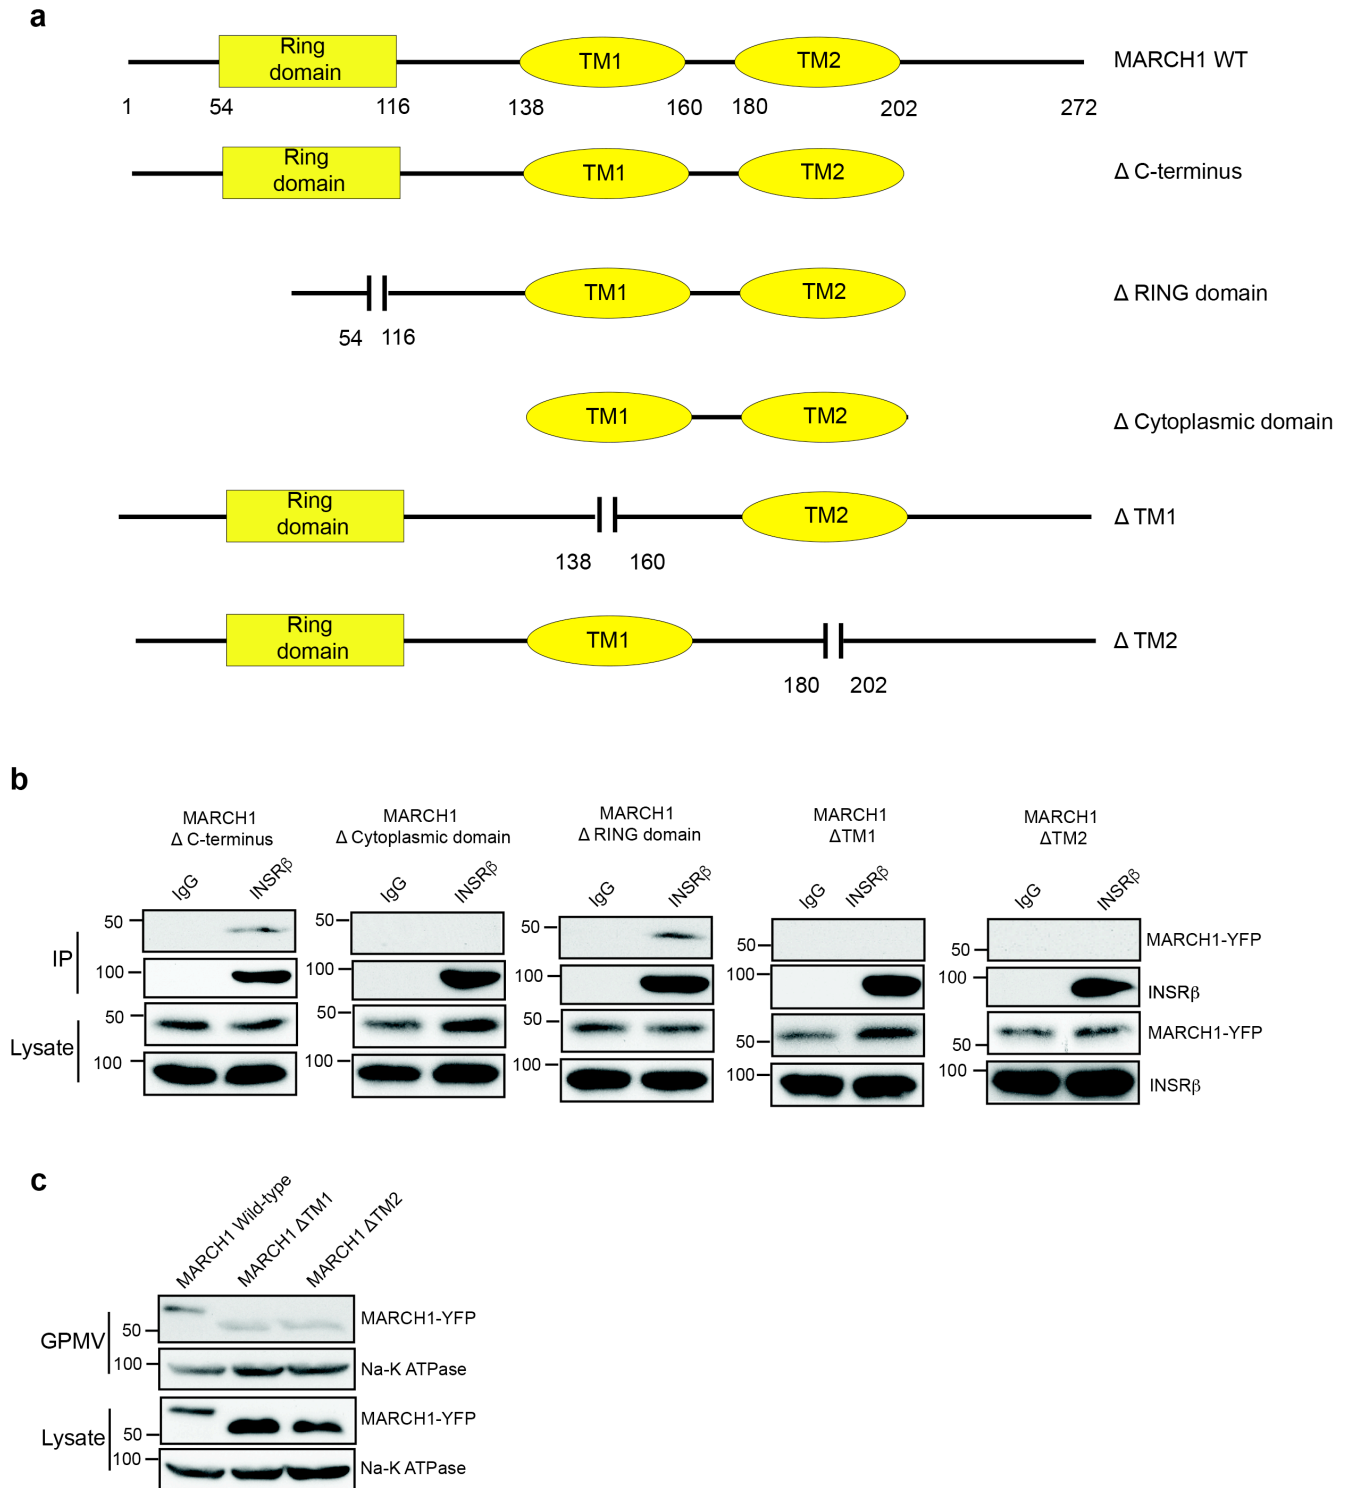

**Supplementary Figure 8. (a)** Schematic for the MARCH1 deletion mutants. **(b)** Indicated MARCH1 deletion mutants were transfected in HeLa cells along with INSR $\beta$  and immunoprecipitation was performed using either IgG or anti-INSR $\beta$  antibody. Both IP products and whole cell lysates were analyzed for indicated protein by immunoblotting. **(c)** Either wild type or indicated MARCH1 transmembrane deletion mutants were transfected in HeLa cells and GPMV and whole cell lysates were analyzed for indicated proteins by immunoblotting to assess MARCH1 localization.



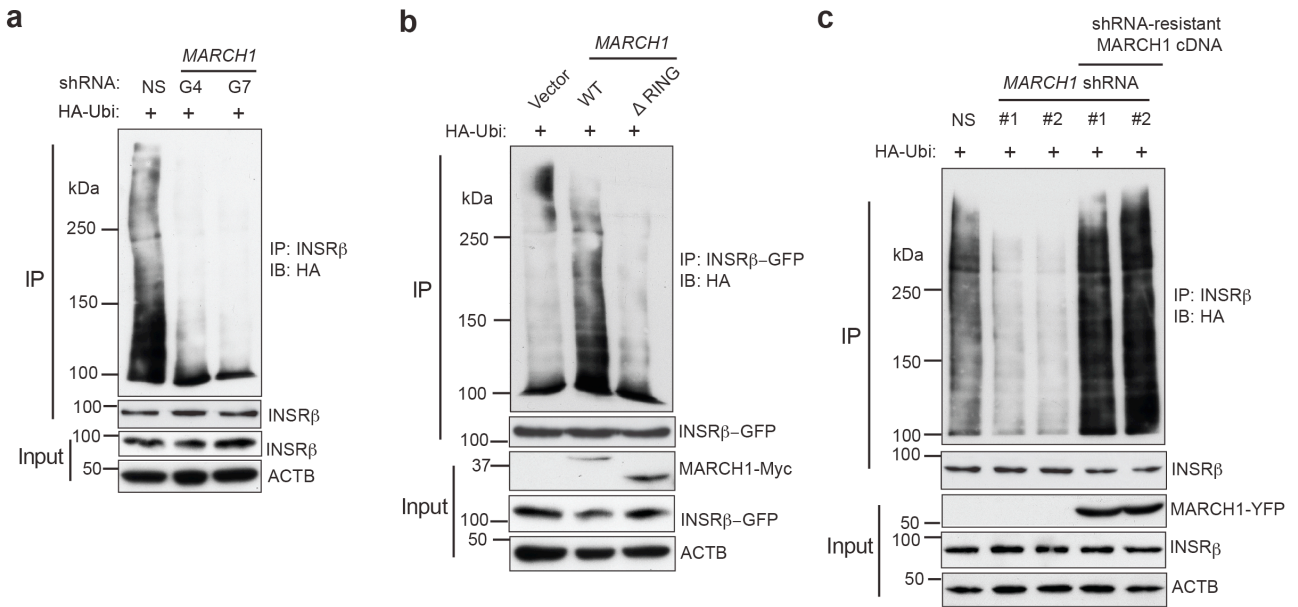

**Supplementary Figure 9. MARCH1 ubiquitinates INSR.** (a) Immunoblot analysis of INSR $\beta$  ubiquitination. INSR $\beta$  immunoprecipitated from HeLa cells expressing NS or *MARCH1* shRNAs and HA-ubiquitin was immunoblotted for HA. Lysates were probed for the indicated proteins. (b) Immunoblot analysis of INSR $\beta$  polyubiquitination. INSR $\beta$  immunoprecipitated from HeLa cells expressing *MARCH1-Myc* or *MARCH1- $\Delta$ RING-Myc* and HA-ubiquitin was immunoblotted for HA. Lysates were probed for indicated proteins. (c) Immunoblot analysis of INSR $\beta$  polyubiquitination. INSR $\beta$  immunoprecipitated from HeLa cells expressing NS or *MARCH1* shRNA #1 or #2 with or without shRNA-resistant *MARCH1* cDNA was immunoblotted for HA-ubiquitin. Lysates were probed for indicated proteins.

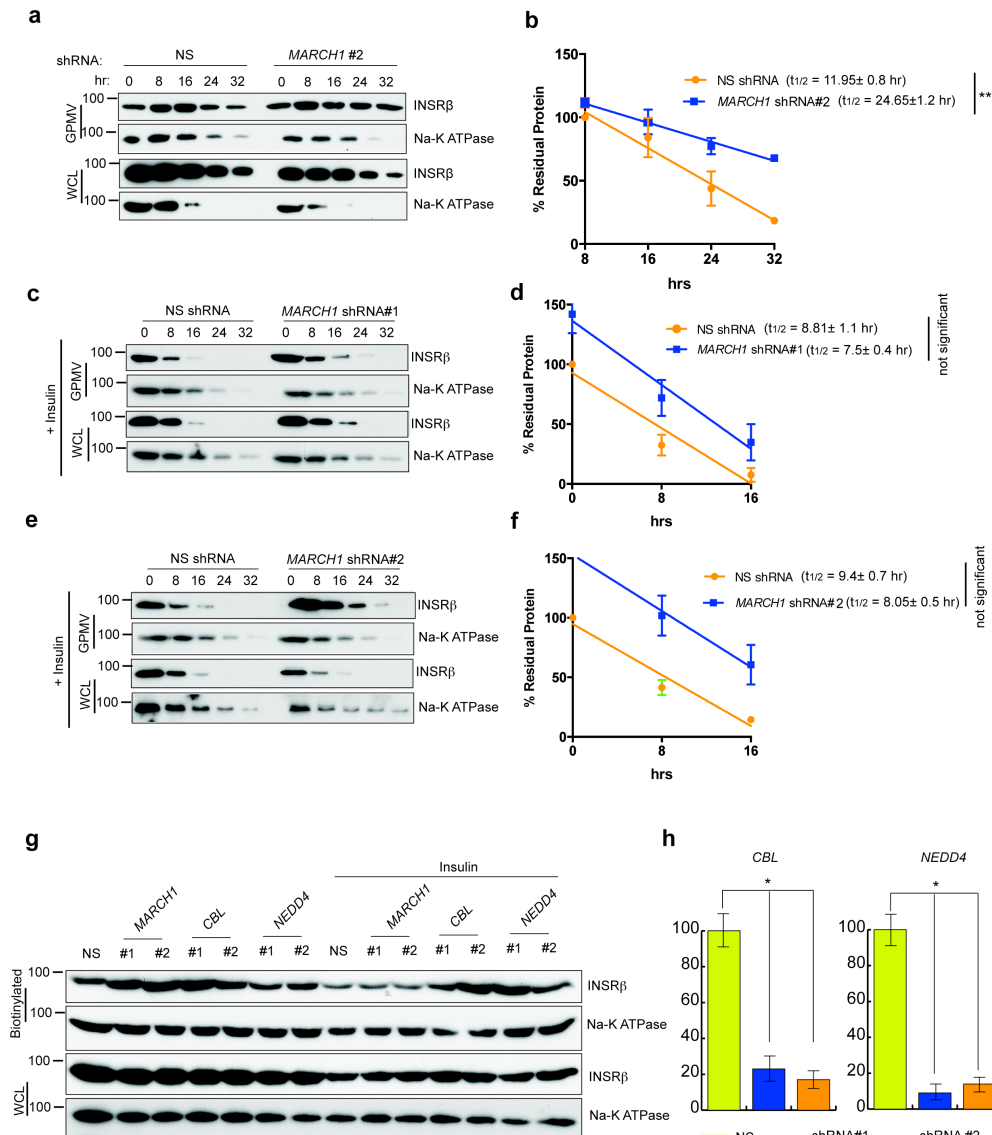

**Supplementary Figure 10. MARCH1 regulates surface INSR $\beta$  half-life through direct ubiquitination.** (a) HeLa cells expressing NS or MARCH1 shRNA#2 were serum starved overnight and treated with cycloheximide (100  $\mu$ g/ml). GPMVs and whole cell lysates (WCL) were collected at indicated time points and analyzed for indicated proteins by immunoblotting. (b) Quantitation of the immunoblots (n=3) shown in (a). (c) HeLa cells expressing indicated shRNAs were serum starved overnight and treated with insulin (5  $\mu$ g/ml) and cycloheximide (100  $\mu$ g/ml). GPMVs and whole cell lysates (WCL) were collected at indicated time points and analyzed for indicated proteins by immunoblotting. (d) Quantitation of the immunoblots (n=3) shown in (c). (e) HeLa cells expressing indicated shRNAs were serum starved overnight and treated with insulin (5  $\mu$ g/ml) and cycloheximide (100  $\mu$ g/ml). GPMVs and whole cell lysates (WCL) were collected at indicated time points and analyzed for indicated proteins by immunoblotting. (f) Quantitation of the immunoblots (n=3) shown in (e). (g) Biotinylation assay. HeLa cells expressing the indicated shRNA were serum starved overnight and left untreated or insulin treated (5  $\mu$ g/ml) for 3 hrs. The biotinylated fraction and whole cell lysates were analyzed for INSR $\beta$  and Na-K ATPase content. (h) HeLa cells expressing non-specific (NS) or CBL or NEDD4 shRNA were analyzed for knockdown efficiency using qRT-PCR (n=3). Data are mean  $\pm$  SEM. \* $P$ <0.05 and \*\* $P$ <0.05, comparisons by  $t$ -test.



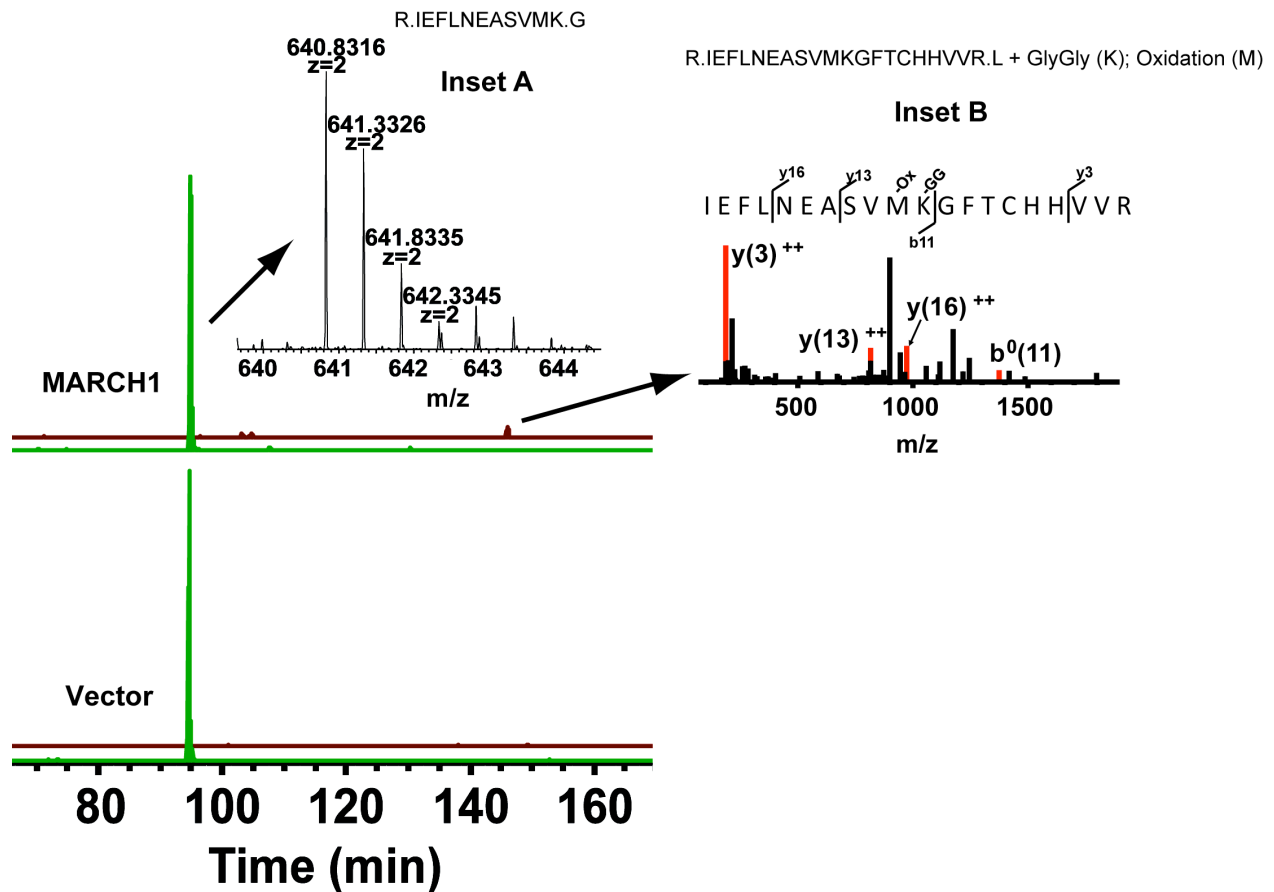

**Supplementary Figure 11. Mass spectrometry analysis of INSR $\beta$  in HeLa cells transfected with vector or MARCH1.** Extracted ion chromatograms are shown for the non-modified (green) and modified (red) INSR $\beta$  peptide derived from vector- (lower) and *MARCH1*- (upper) transfected HeLa cells. Inset A shows the averaged mass spectrum corresponding to the non-modified peptide. Inset B indicates the corresponding MS/MS fragmentation of the modified peptide at m/z 816.4086 with assigned b- and y- fragment ions. Above the MS/MS spectrum is the modified peptide sequence indicating the location of the identified modified lysine residue. Note that methionine is oxidized.

Figure 1c

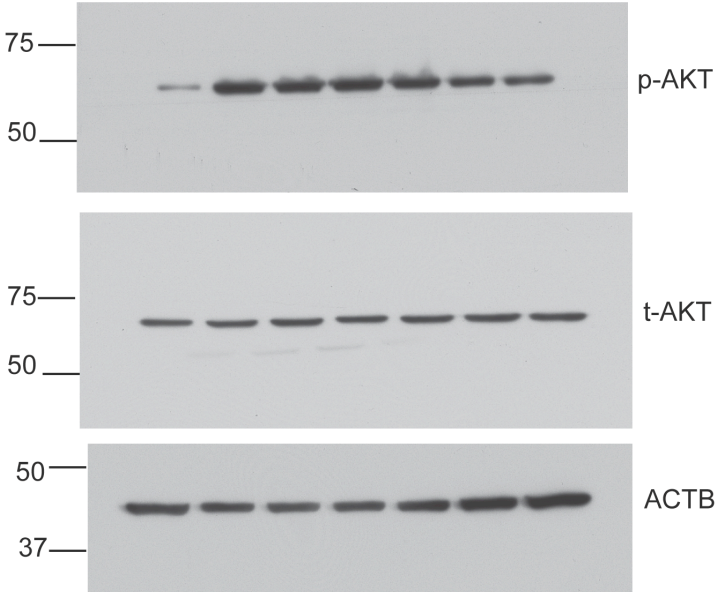

Figure 2c

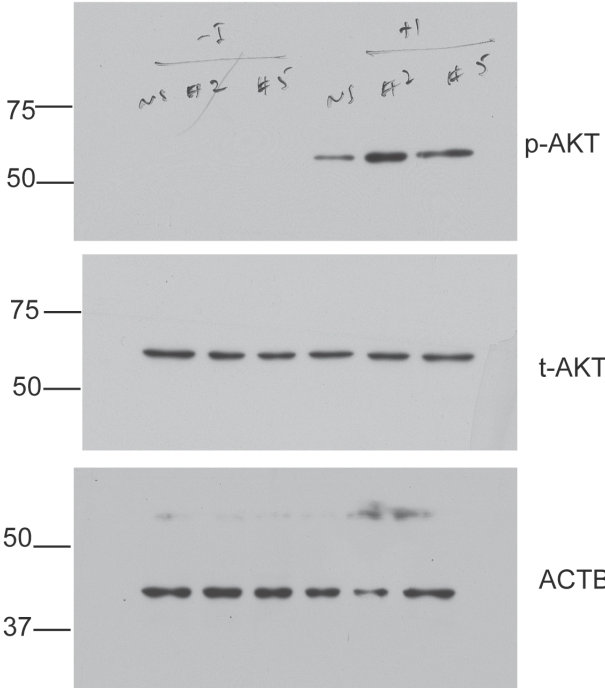

Figure 2f

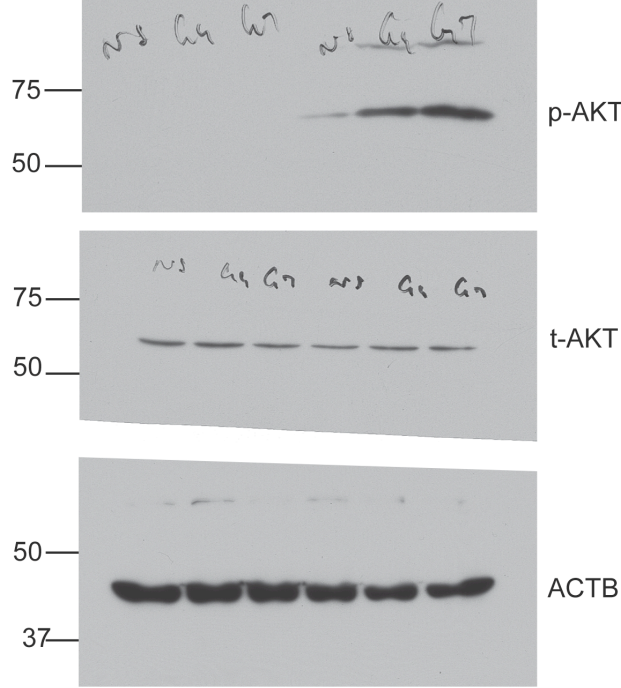

**Figure 5a**

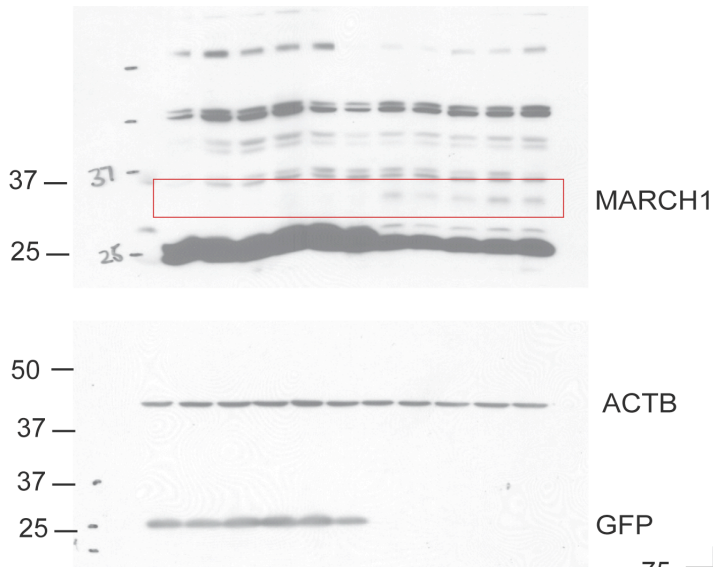

**Figure 7a**

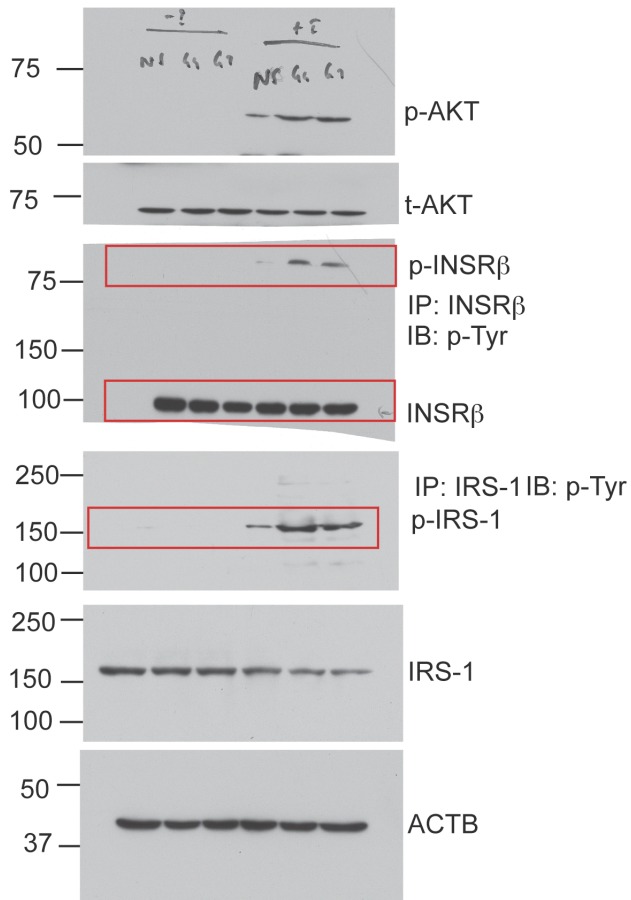

**Figure 7b**

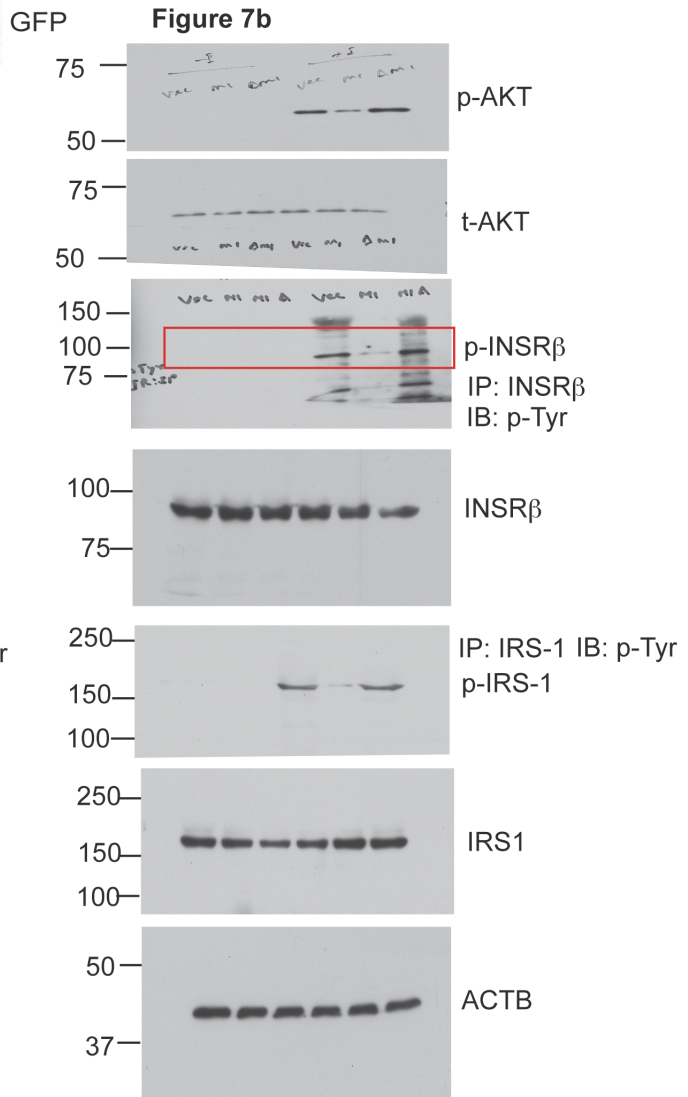

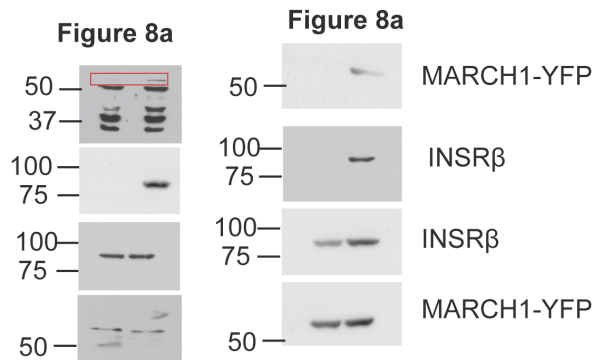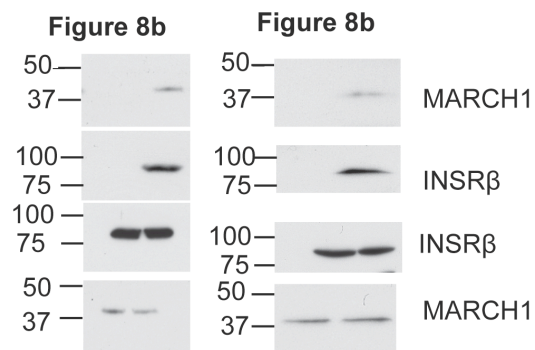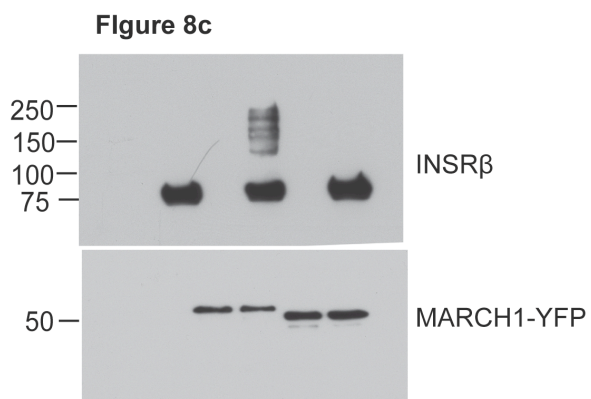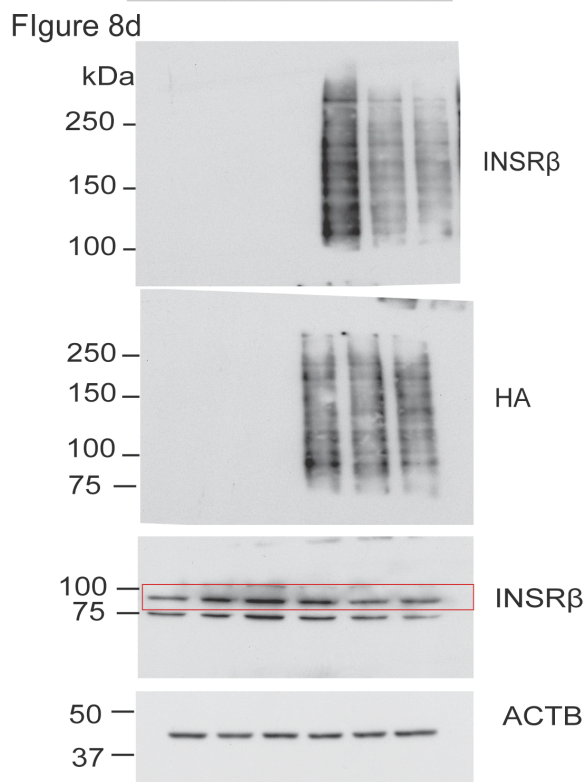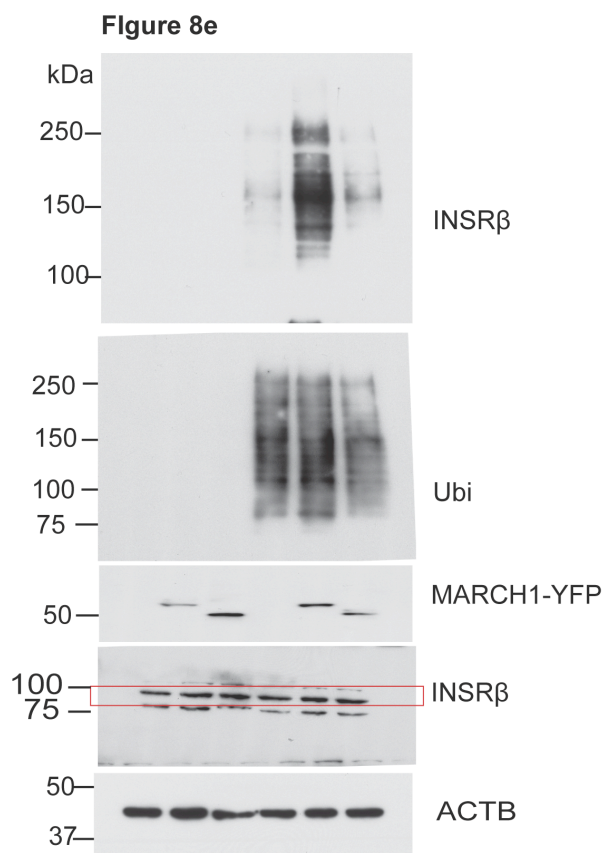



**Figure 8f**

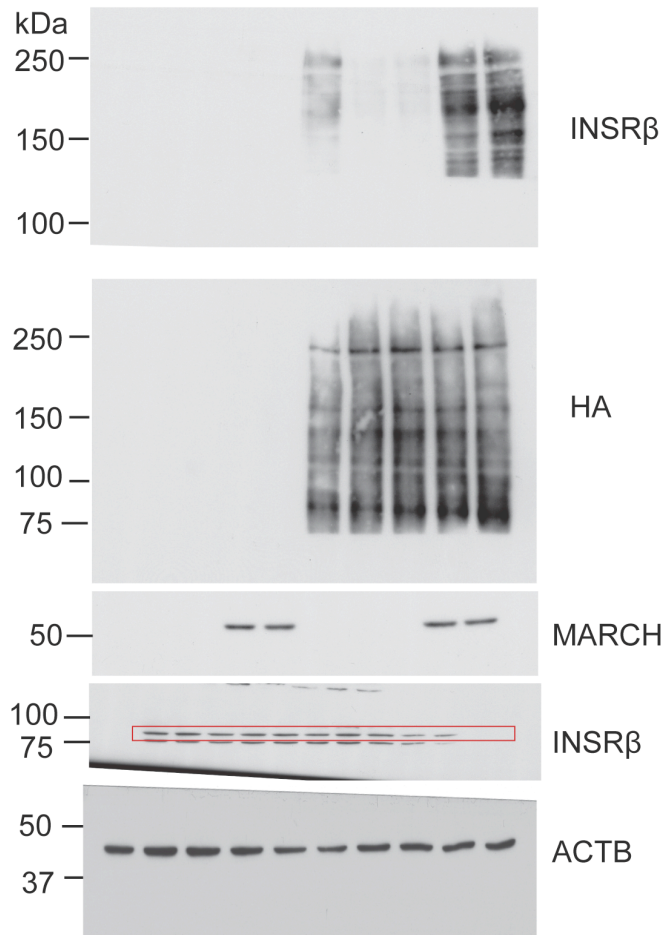

**Figure 8g**

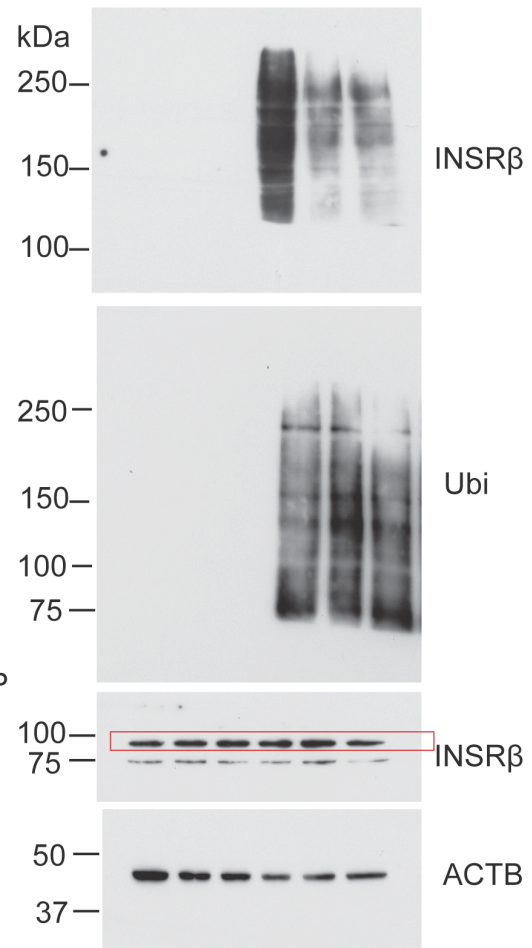

**Figure 8h**

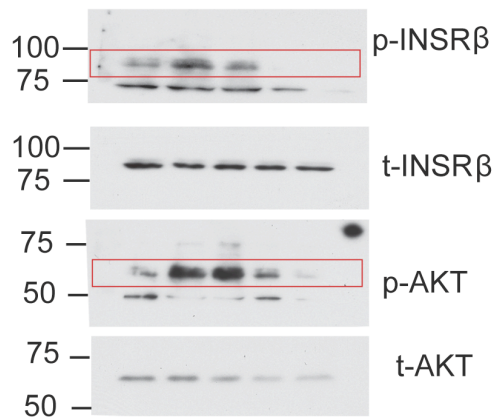

**Figure 9a**

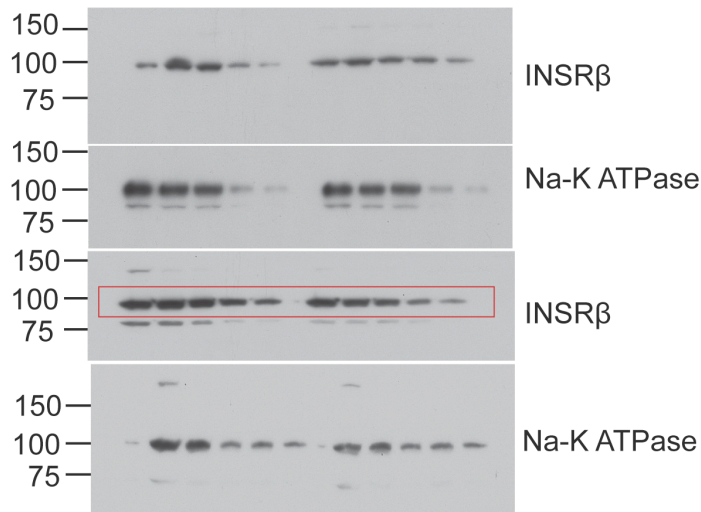

**Figure 9c**

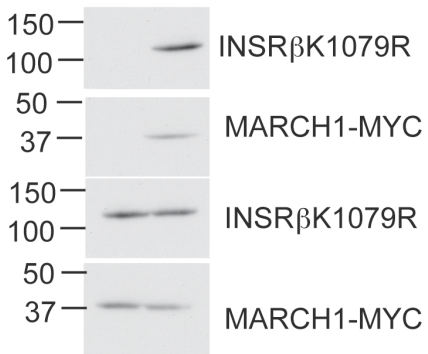

**Figure 9d**

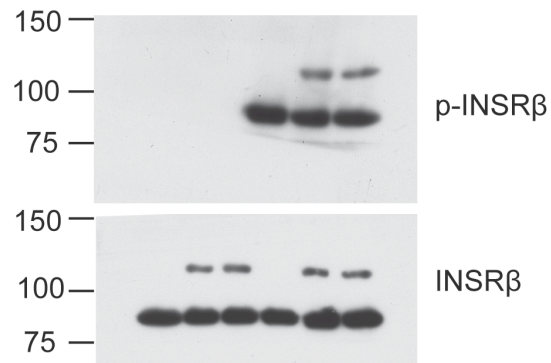

**Figure 9e**

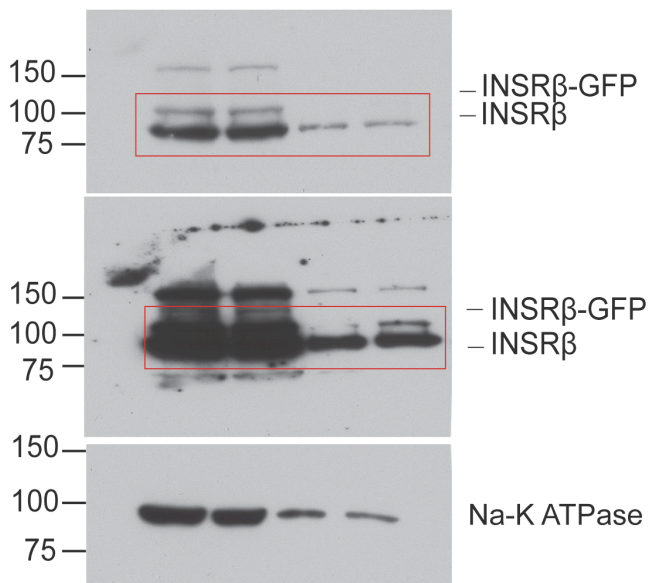

**Figure 9g**

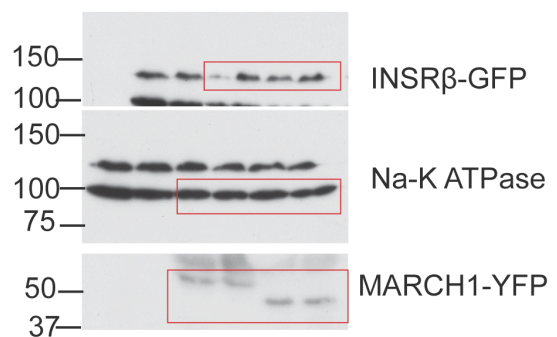

Suppl. Fig. 1b

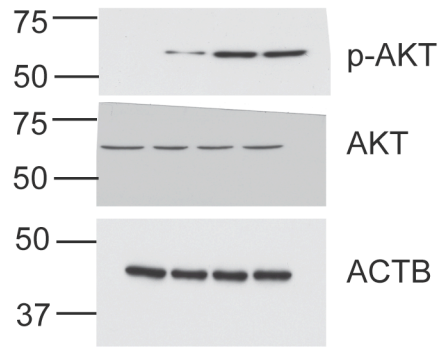

Suppl. Fig. 2c

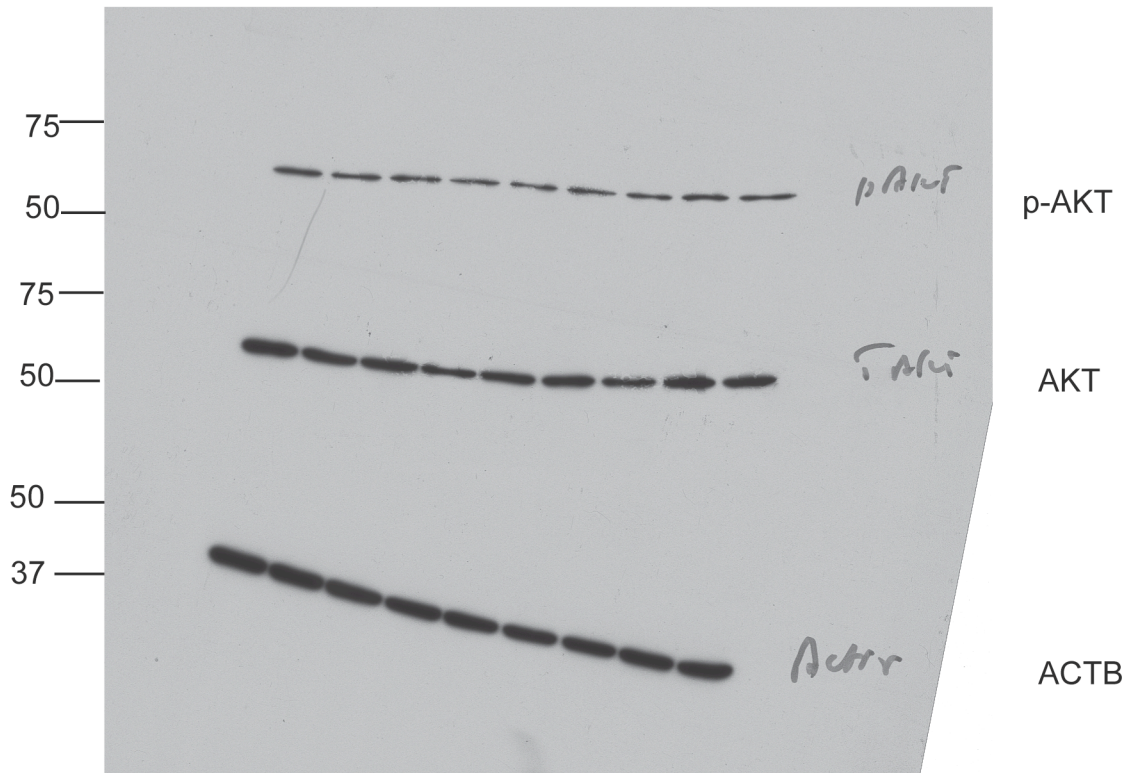



Suppl. Fig. 6a

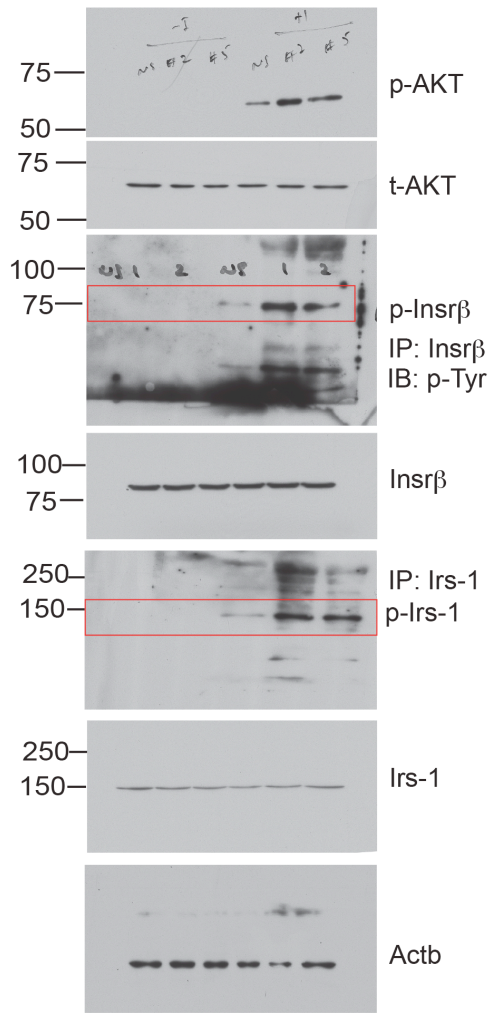

Suppl. Fig. 6b

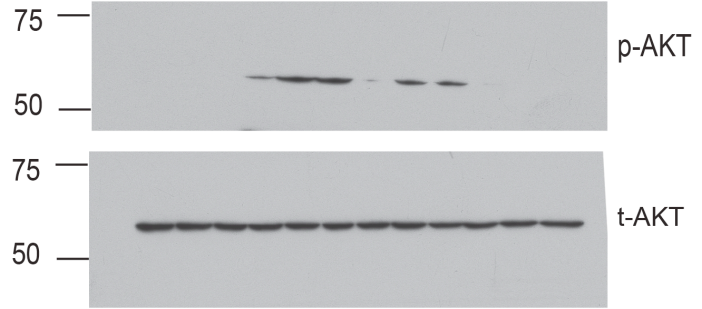

Suppl. Fig. 6c

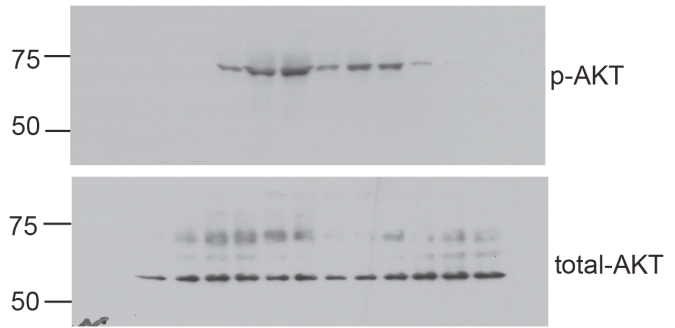

Suppl. Fig. 6e

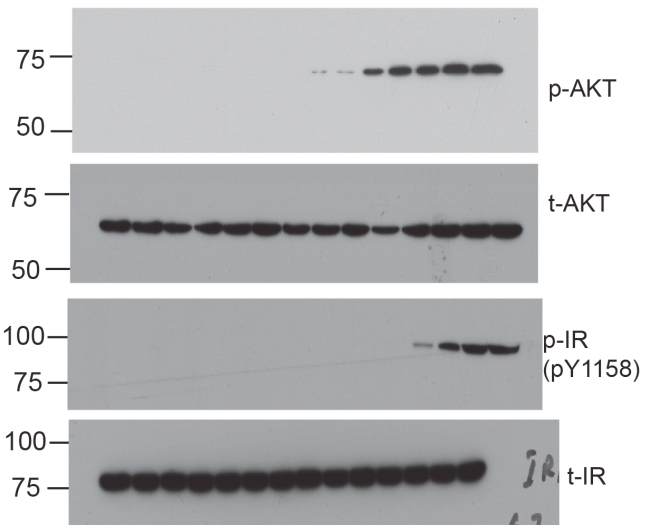

Suppl. Fig. 6d

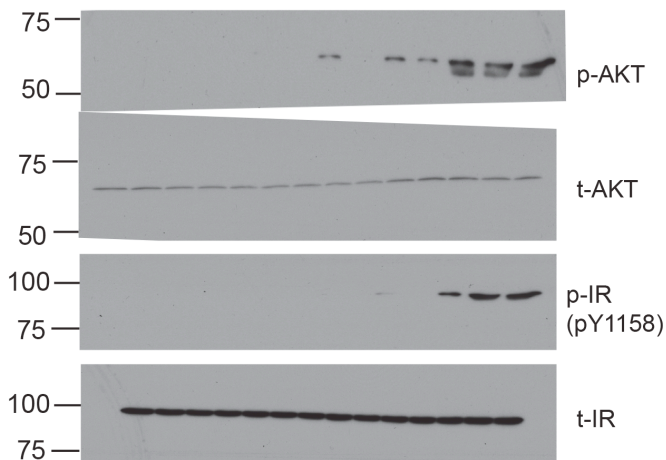



Suppl. Fig. 7a

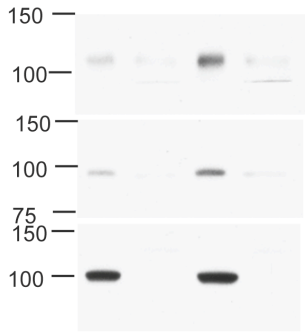

Suppl. Fig. 7b

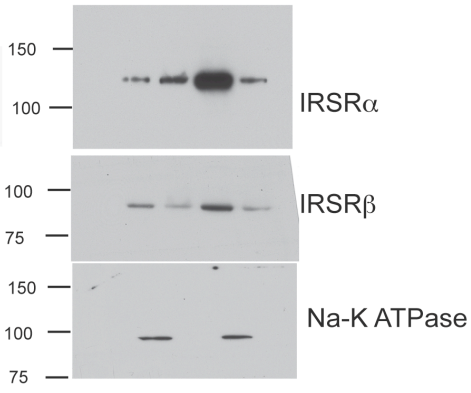

Suppl. Fig. 7c

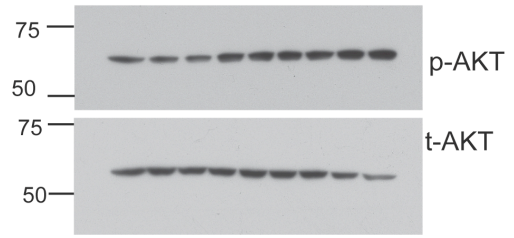

Suppl. Fig. 7f

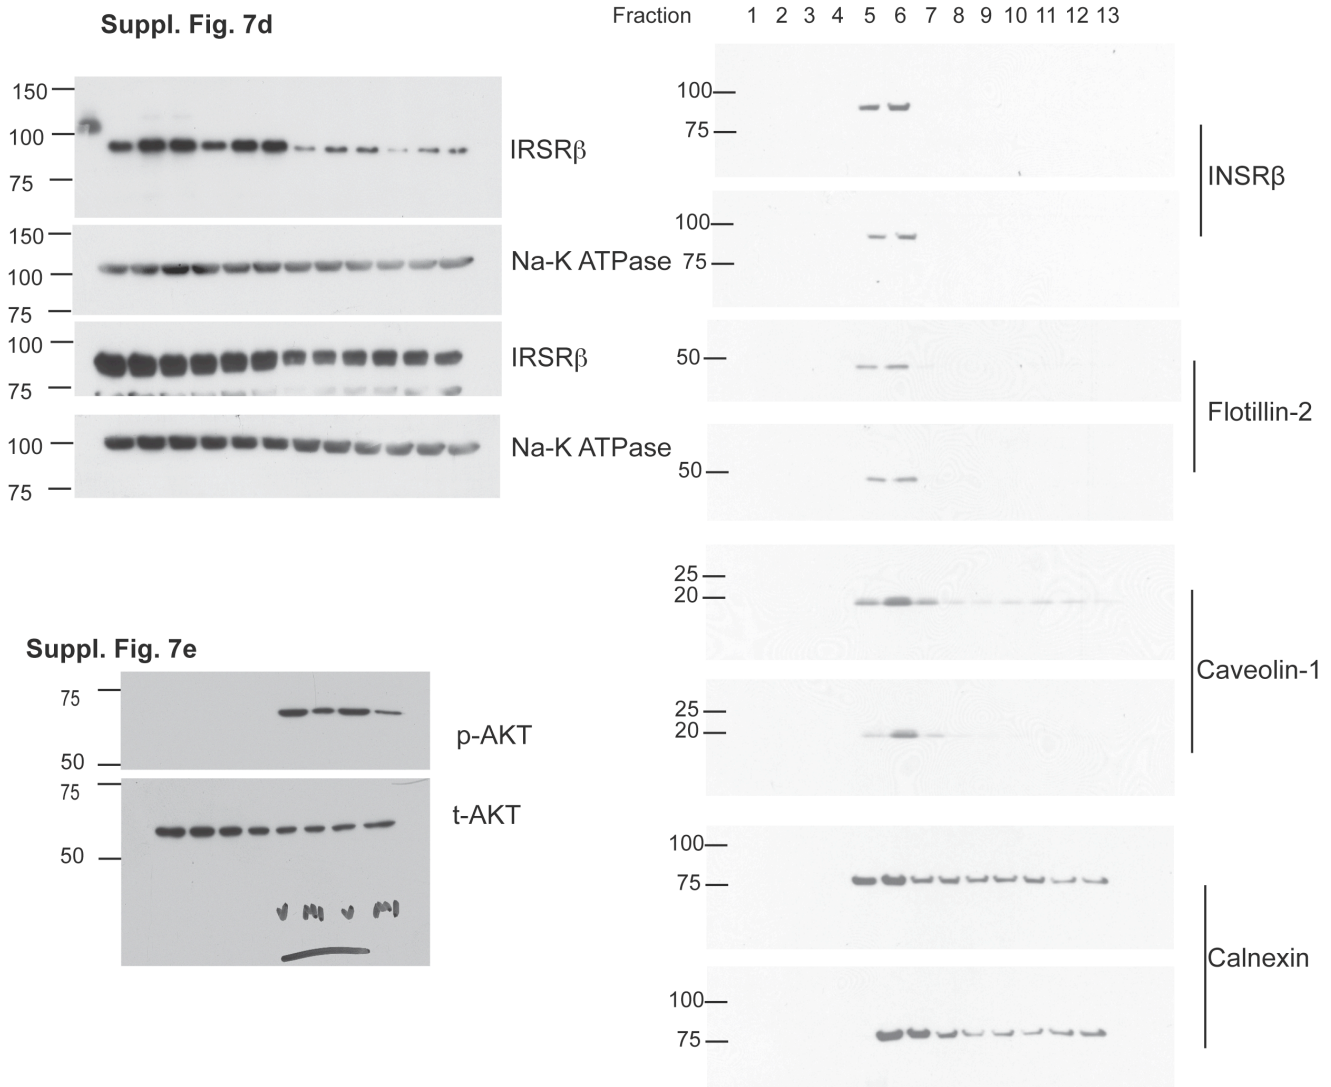

**Suppl. Fig. 8b**

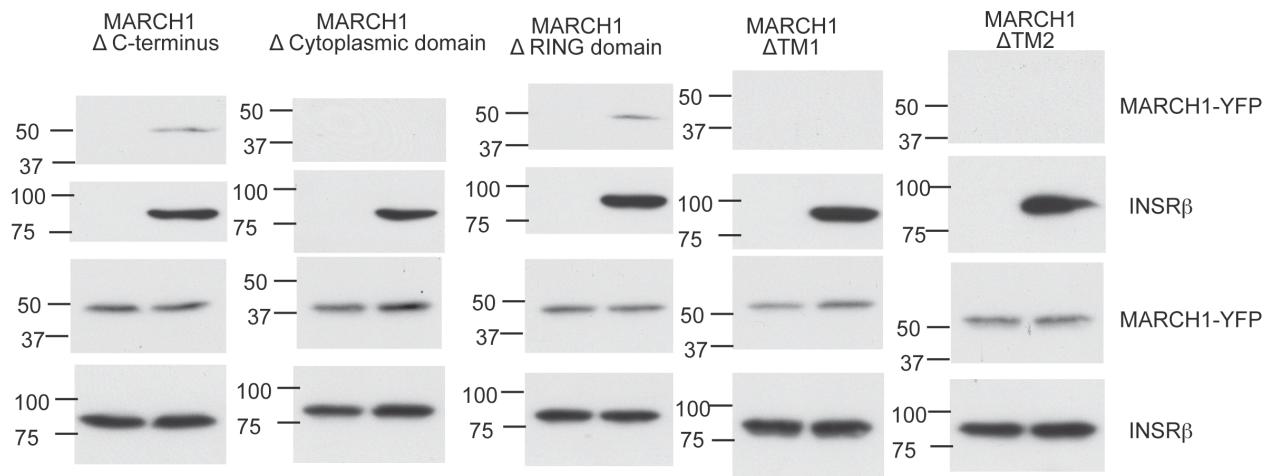

**Suppl. Fig. 8c**

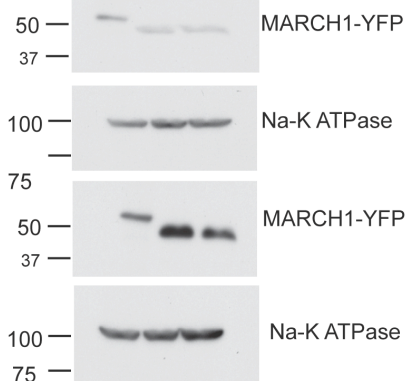

**Suppl. Fig. 9a**

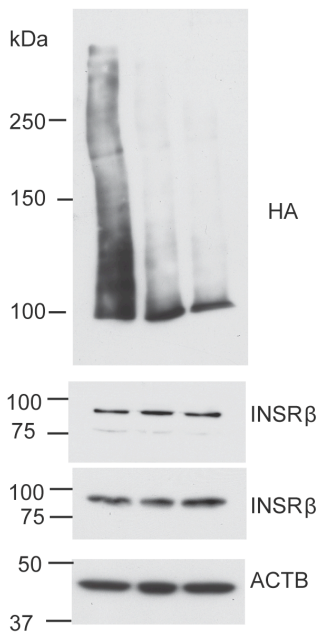

**Suppl. Fig. 9b**

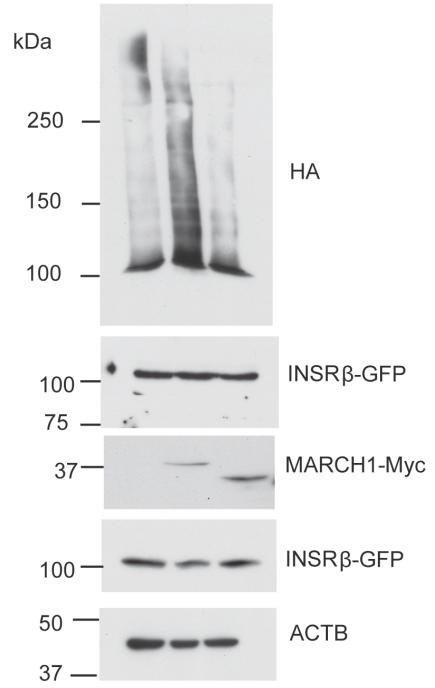

**Suppl. Fig. 9c**

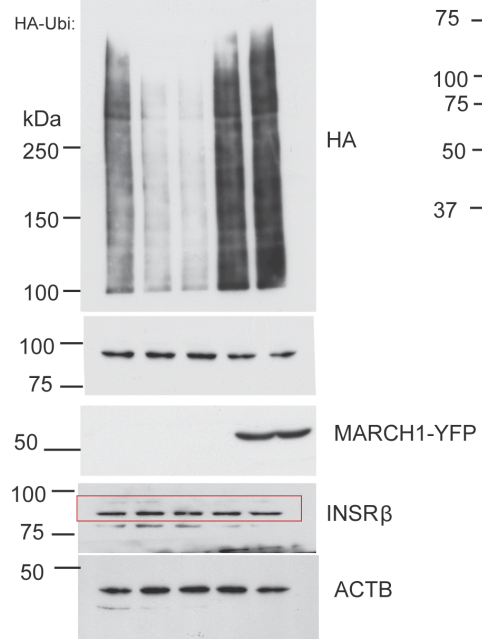

**Suppl. Fig. 10a**

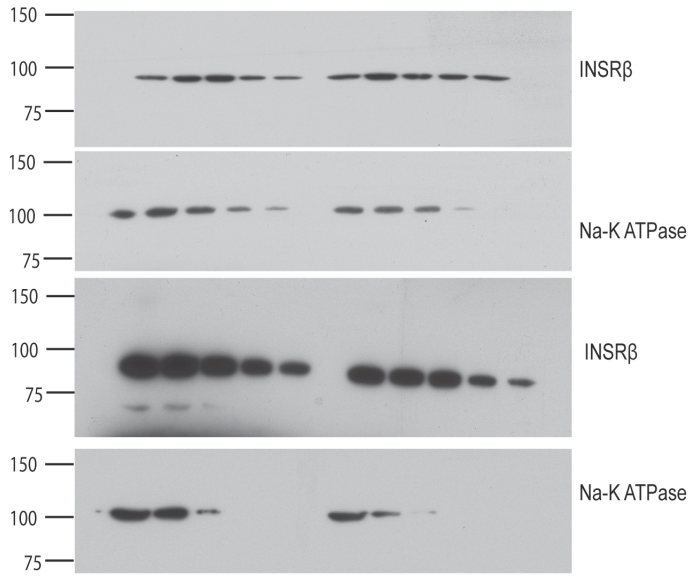

**Suppl. Fig. 10c**

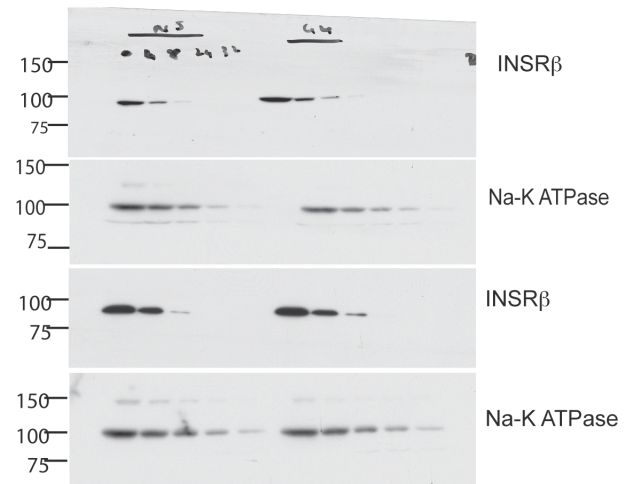

**Suppl. Fig. 10e**

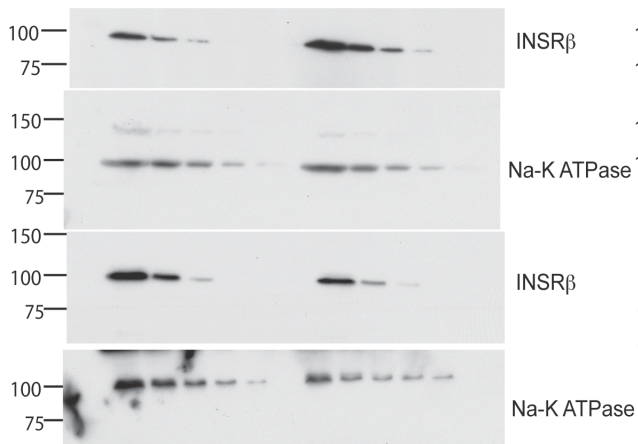

**Suppl. Fig. 10g**

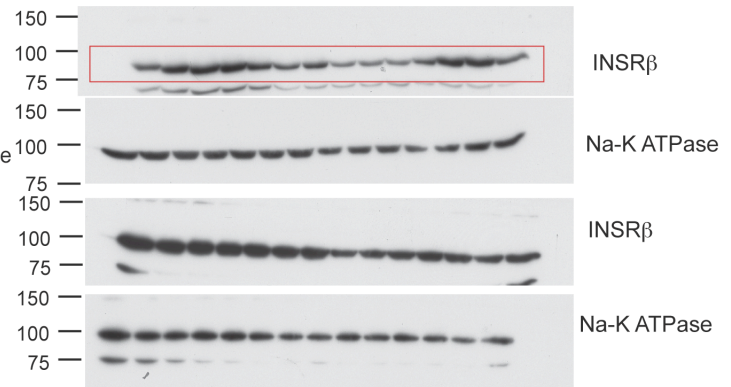

**Supplementary Figure 12. Uncropped images of western blot analysis.**

**Supplementary Table 1. List of E3 ligase/adaptor genes targeted by the shRNAs in the large-scale RNAi screen**

| <b>Gene Name</b> | <b>Accession Number</b>                                                                                          |
|------------------|------------------------------------------------------------------------------------------------------------------|
| ANKIB1           | NM_019004                                                                                                        |
| ANAPC11          | NM_001002244 NM_001002245 NM_001002246 NM_001002247 NM_001002248<br>NM_001002249 NM_016476                       |
| ARIH1            | NM_005744                                                                                                        |
| ARIH2            | NM_006321                                                                                                        |
| AMFR             | NM_001144                                                                                                        |
| MARCH7           | NM_022826                                                                                                        |
| BIRC2            | NM_001166                                                                                                        |
| BIRC3            | NM_001165 NM_182962                                                                                              |
| BIRC4            | NM_001167                                                                                                        |
| BIRC7            | NM_022161 NM_139317                                                                                              |
| BIRC8            | NM_033341                                                                                                        |
| BFAR             | NM_016561                                                                                                        |
| BMI1             | NM_005180                                                                                                        |
| BRAP             | NM_006768                                                                                                        |
| BARD1            | NM_000465                                                                                                        |
| BRCA1            | NM_007294 NM_007295 NM_007296 NM_007297 NM_007298 NM_007299 NM_007300<br>NM_007302 NM_007303 NM_007304 NM_007305 |
| CBL              | NM_005188                                                                                                        |
| CBLB             | NM_170662                                                                                                        |
| CBLC             | NM_012116                                                                                                        |
| CBLL1            | NM_024814                                                                                                        |
| CNOT4            | NM_001008225 NM_013316                                                                                           |
| CGRRF1           | NM_006568                                                                                                        |
| CHFR             | NM_018223                                                                                                        |
| C1orf164         | NM_018150                                                                                                        |
| C13orf7          | NM_024546                                                                                                        |
| C14orf4          | NM_024496                                                                                                        |
| C16orf28         | NM_023076                                                                                                        |
| KIAA1542         | NM_020901                                                                                                        |
| CCNB1IP1         | NM_021178 NM_182849 NM_182851 NM_182852                                                                          |
| DPF1             | NM_004647                                                                                                        |
| DCST1            | NM_152494                                                                                                        |
| DTX3             | NM_178502                                                                                                        |
| DTX3L            | NM_138287                                                                                                        |
| DTX4             | NM_015177                                                                                                        |
| DTX1             | NM_004416                                                                                                        |
| DTX2             | NM_020892                                                                                                        |
| FANCL            | NM_018062                                                                                                        |
| GTF2H2           | NM_001515                                                                                                        |
| HLTF             | NM_003071 NM_139048                                                                                              |
| IBRDC1           | NM_152553                                                                                                        |
| IBRDC2           | NM_182757                                                                                                        |

|          |                                                   |
|----------|---------------------------------------------------|
| IBRDC3   | NM_153341                                         |
| LRSAM1   | NM_001005373 NM_001005374 NM_138361               |
| LNK1     | NM_032622                                         |
| LNK2     | NM_153371                                         |
| LINCR    | NM_001080535                                      |
| LONRF1   | NM_152271                                         |
| LONRF2   | NM_198461                                         |
| LONRF3   | NM_001031855 NM_024778                            |
| MGRN1    | NM_015246                                         |
| MKRN1    | NM_013446                                         |
| MKRN2    | NM_014160                                         |
| MKRN3    | NM_005664                                         |
| MSL2L1   | NM_018133                                         |
| MDM2     | NM_002392 NM_006878 NM_006879 NM_006881 NM_006882 |
| MDM4     | NM_002393                                         |
| 'MARCH1  | NM_017923                                         |
| 'MARCH2  | NM_001005415 NM_001005416 NM_016496               |
| 'MARCH3  | NM_178450                                         |
| 'MARCH4  | NM_020814                                         |
| 'MARCH5  | NM_017824                                         |
| 'MARCH6  | NM_005885                                         |
| 'MARCH8  | NM_001002265 NM_001002266 NM_145021               |
| 'MARCH9  | NM_138396                                         |
| MNAT1    | NM_002431                                         |
| MID1     | NM_033291 NM_000381 NM_001098624 NM_033290        |
| MID2     | NM_012216 NM_052817                               |
| MIB1     | NM_020774                                         |
| MIB2     | NM_080875                                         |
| MAP3K1   | XM_001128827 XM_042066                            |
| C1orf166 | NM_024544                                         |
| MYCBP2   | NM_015057                                         |
| MYLIP    | NM_013262                                         |
| NEURL    | NM_004210                                         |
| NHLRC1   | NM_198586                                         |
| NSMCE1   | NM_145080                                         |
| NFX1     | NM_002504 NM_147133 NM_147134                     |
| NFXL1    | NM_152995                                         |
| OSTM1    | NM_014028                                         |
| PARC     | NM_015089                                         |
| PARK2    | NM_004562 NM_013987 NM_013988                     |
| PDZRN3   | NM_015009                                         |
| PDZRN4   | NM_013377                                         |
| PEX12    | NM_000286                                         |
| PXMP3    | NM_000318 NM_001079867                            |
| PEX10    | NM_002617 NM_153818                               |
| PHF7     | NM_016483 NM_173341                               |

|          |                                                                                              |
|----------|----------------------------------------------------------------------------------------------|
| PCGF1    | NM_032673                                                                                    |
| PCGF2    | NM_007144                                                                                    |
| PCGF3    | NM_006315                                                                                    |
| PCGF5    | NM_032373                                                                                    |
| PCGF6    | NM_001011663 NM_032154                                                                       |
| PJA1     | NM_001032396 NM_022368 NM_145119                                                             |
| PJA2     | NM_014819                                                                                    |
| PML      | NM_002675 NM_033238 NM_033239 NM_033240 NM_033244 NM_033246 NM_033247<br>NM_033249 NM_033250 |
| LOC51136 | NM_016125                                                                                    |
| RAD18    | NM_020165                                                                                    |
| ATRX     | NM_138271 NM_000489 NM_138270                                                                |
| RBCK1    | NM_006462 NM_031229                                                                          |
| RAPSN    | NM_005055 NM_032645                                                                          |
| RAG1     | NM_000448                                                                                    |
| RFPL1    | NM_021026                                                                                    |
| RFPL3    | NM_001098535 NM_006604                                                                       |
| RFPL4A   | XM_292796                                                                                    |
| RFPL4B   | NM_001013734                                                                                 |
| RBBP6    | NM_006910 NM_018703 NM_032626                                                                |
| RC3H1    | NM_172071                                                                                    |
| RC3H2    | NM_018835                                                                                    |
| RCHY1    | NM_001008925 NM_001009922 NM_015436                                                          |
| RFFL     | NM_001017368 NM_057178                                                                       |
| RKHD1    | NM_001085363 NM_203304                                                                       |
| RKHD2    | NM_016626                                                                                    |
| RKHD3    | NM_032246                                                                                    |
| RKHD4    | NM_001093725                                                                                 |
| RSPRY1   | NM_133368                                                                                    |
| RFWD2    | NM_001001740 NM_022457                                                                       |
| RFWD3    | NM_018124                                                                                    |
| RNF6     | NM_183045 NM_005977 NM_183043 NM_183044                                                      |
| RING1    | NM_002931                                                                                    |
| RNF10    | NM_014868                                                                                    |
| RNF103   | NM_005667                                                                                    |
| RNF11    | NM_014372                                                                                    |
| RNF111   | NM_017610                                                                                    |
| RNF113A  | NM_006978                                                                                    |
| RNF113B  | NM_178861                                                                                    |
| RNF12    | NM_016120 NM_183353                                                                          |
| RNF121   | NM_018320 NM_194452 NM_194453                                                                |
| RNF122   | NM_024787                                                                                    |
| RNF123   | NM_022064                                                                                    |
| RNF125   | NM_017831                                                                                    |
| RNF126   | NM_017876 NM_194460                                                                          |
| RNF128   | NM_024539 NM_194463                                                                          |

|        |                                                   |
|--------|---------------------------------------------------|
| RNF13  | NM_183382 NM_007282 NM_183381 NM_183383 NM_183384 |
| RNF130 | NM_018434                                         |
| RNF133 | NM_139175                                         |
| RNF135 | NM_032322 NM_197939                               |
| RNF138 | NM_016271 NM_198128                               |
| RNF139 | NM_007218                                         |
| RNF14  | NM_004290 NM_183398 NM_183399 NM_183400 NM_183401 |
| RNF141 | NM_016422                                         |
| RNF144 | NM_014746                                         |
| RNF145 | NM_144726                                         |
| RNF146 | NM_030963                                         |
| RNF148 | NM_198085                                         |
| RNF149 | NM_173647                                         |
| RNF150 | NM_020724                                         |
| RNF151 | NM_174903                                         |
| RNF152 | NM_173557                                         |
| RNF157 | NM_052916                                         |
| RNF165 | NM_152470                                         |
| RNF166 | NM_178841                                         |
| RNF167 | NM_015528                                         |
| RNF168 | NM_152617                                         |
| RNF169 | NM_001098638                                      |
| RNF17  | NM_031277                                         |
| RNF170 | NM_030954                                         |
| RNF175 | NM_173662                                         |
| RNF180 | NM_178532                                         |
| RNF181 | NM_016494                                         |
| RNF182 | NM_152737                                         |
| RNF183 | NM_145051                                         |
| RNF185 | NM_152267                                         |
| RNF186 | NM_019062                                         |
| RNF187 | XM_001129309 XM_928029                            |
| RNF19  | NM_015435 NM_183419                               |
| RNF190 | NM_152598                                         |
| RNF2   | NM_007212                                         |
| RNF20  | NM_019592                                         |
| RNF207 | NM_173795 NM_207396                               |
| RNF208 | NM_031297                                         |
| RNF212 | NM_194439                                         |
| RNF213 | NM_020914                                         |
| RNF214 | NM_001077239 NM_207343                            |
| RNF215 | NM_001017981                                      |
| RNF24  | NM_007219                                         |
| RNF25  | NM_022453                                         |
| RNF26  | NM_032015                                         |
| RNF31  | NM_017999                                         |



|           |                                                   |
|-----------|---------------------------------------------------|
| RNF32     | NM_030936                                         |
| RNF34     | NM_025126 NM_194271                               |
| RNF38     | NM_022781 NM_194328 NM_194329 NM_194330 NM_194332 |
| RNF39     | NM_170770 NM_025236 NM_170769                     |
| RNF4      | NM_002938                                         |
| RNF40     | NM_014771                                         |
| RNF41     | NM_005785 NM_194358 NM_194359                     |
| RNF43     | NM_017763                                         |
| RNF44     | NM_014901                                         |
| RNF5      | NM_006913                                         |
| RNF7      | NM_014245 NM_183237                               |
| RNF8      | NM_003958 NM_183078                               |
| RBX1      | NM_014248                                         |
| SIAH1     | NM_001006610 NM_003031                            |
| SIAH2     | NM_005067                                         |
| SH3RF1    | NM_020870                                         |
| SH3RF2    | NM_152550                                         |
| LOC441061 | XM_496738 XM_941081                               |
| LOC390231 | XM_372423 XM_936301                               |
| LOC399937 | XM_374917 XM_930197                               |
| TRIM49    | NM_020358                                         |
| LOC120824 | XM_062300                                         |
| LOC283116 | XM_208043                                         |
| LOC399939 | XM_374919                                         |
| SHPRH     | NM_001042683 NM_173082                            |
| SPRYD5    | NM_032681                                         |
| SYVN1     | NM_032431 NM_172230                               |
| TTC3      | NM_001001894 NM_003316                            |
| TRAF2     | NM_021138                                         |
| TRAF3     | NM_003300 NM_145725 NM_145726                     |
| TRAF4     | NM_145751 NM_004295                               |
| TRAF5     | NM_001033910 NM_004619 NM_145759                  |
| TRAF6     | NM_004620 NM_145803                               |
| TRAF7     | NM_206835 NM_032271                               |
| TOPORS    | NM_005802                                         |
| TRAIP     | NM_005879                                         |
| TRIAD3    | NM_207111 NM_207116                               |
| TRIML1    | NM_178556                                         |
| TRIM10    | NM_006778 NM_052828                               |
| TRIM11    | NM_145214                                         |
| TRIM13    | NM_001007278 NM_005798 NM_052811 NM_213590        |
| TRIM15    | NM_052812 NM_033229                               |
| TRIM17    | NM_001024940 NM_001024941 NM_016102               |
| TRIM2     | NM_015271                                         |
| TRIM21    | NM_003141                                         |
| TRIM22    | NM_006074                                         |



|        |                                                             |
|--------|-------------------------------------------------------------|
| TRIM23 | NM_001656 NM_033227 NM_033228                               |
| TRIM24 | NM_003852 NM_015905                                         |
| TRIM25 | NM_005082                                                   |
| TRIM26 | NM_003449                                                   |
| TRIM27 | NM_030950 NM_006510                                         |
| TRIM28 | NM_005762                                                   |
| TRIM3  | NM_006458 NM_033278                                         |
| TRIM31 | NM_052816 NM_007028                                         |
| TRIM32 | NM_012210                                                   |
| TRIM33 | NM_015906 NM_033020                                         |
| TRIM34 | NM_001003827 NM_021616 NM_130389 NM_130390                  |
| TRIM35 | NM_171982                                                   |
| TRIM36 | NM_001017397 NM_001017398 NM_018700                         |
| TRIM37 | NM_001005207 NM_015294                                      |
| TRIM38 | NM_006355                                                   |
| TRIM39 | NM_021253 NM_172016                                         |
| TRIM4  | NM_033017 NM_033091                                         |
| TRIM40 | NM_138700                                                   |
| TRIM41 | NM_033549 NM_201627                                         |
| TRIM42 | NM_152616                                                   |
| TRIM43 | NM_138800                                                   |
| TRIM45 | NM_025188                                                   |
| TRIM46 | NM_025058                                                   |
| TRIM47 | NM_033452                                                   |
| TRIM48 | NM_024114                                                   |
| TRIM5  | NM_033034 NM_033092 NM_033093                               |
| TRIM50 | NM_178125                                                   |
| TRIM52 | NM_032765                                                   |
| TRIM54 | NM_032546 NM_187841                                         |
| TRIM55 | NM_033058 NM_184085 NM_184086 NM_184087                     |
| TRIM56 | NM_030961                                                   |
| TRIM58 | NM_015431                                                   |
| TRIM59 | NM_173084                                                   |
| TRIM6  | NM_001003818 NM_058166                                      |
| TRIM60 | NM_152620                                                   |
| TRIM61 | NM_001012414                                                |
| TRIM62 | NM_018207                                                   |
| TRIM63 | NM_032588                                                   |
| TRIM64 | XM_061890                                                   |
| TRIM65 | NM_173547                                                   |
| TRIM67 | NM_001004342                                                |
| TRIM68 | NM_018073                                                   |
| TRIM69 | NM_080745 NM_182985                                         |
| TRIM7  | NM_033342 NM_203293 NM_203294 NM_203295 NM_203296 NM_203297 |
| TRIM72 | NM_001008274                                                |
| TRIM73 | NM_198924                                                   |

|           |                                                                          |
|-----------|--------------------------------------------------------------------------|
| TRIM74    | NM_198853                                                                |
| TRIM75    | XM_373039 XM_939332                                                      |
| TRIM8     | NM_030912                                                                |
| TRIM9     | NM_015163 NM_052978                                                      |
| UBR1      | NM_174916                                                                |
| UBR2      | NM_015255                                                                |
| UBR4      | NM_020765                                                                |
| UHRF1     | NM_001048201 NM_013282                                                   |
| UHRF2     | NM_152896                                                                |
| UBOX5     | NM_014948 NM_199415                                                      |
| UNK       | NM_001080419                                                             |
| VPS11     | NM_021729                                                                |
| VPS18     | NM_020857                                                                |
| VPS41     | NM_014396 NM_080631                                                      |
| VPS8      | NM_001009921 NM_015303                                                   |
| WHSC1     | NM_133336 NM_001042424 NM_007331 NM_133330 NM_133331 NM_133334 NM_133335 |
| ZNRF1     | NM_032268                                                                |
| ZNRF2     | NM_147128                                                                |
| ZNRF3     | NM_032173                                                                |
| ZNRF4     | NM_181710                                                                |
| DZIP3     | NM_014648                                                                |
| ZNF179    | NM_007148                                                                |
| ZNF294    | NM_015565                                                                |
| ZNF313    | NM_018683                                                                |
| ZNF364    | NM_014455                                                                |
| ZNF598    | NM_178167                                                                |
| ZNF645    | NM_152577                                                                |
| ZNF650    | NM_172070                                                                |
| ZFPL1     | NM_006782                                                                |
| ZSWIM2    | NM_182521                                                                |
| LOC150739 | XM_092267                                                                |
| NOSIP     | NM_015953                                                                |
| PPIL2     | NM_014337 NM_148175 NM_148176                                            |
| PRPF19    | NM_014502                                                                |
| STUB1     | NM_005861                                                                |
| UBE4A     | NM_004788                                                                |
| UBE4B     | NM_006048                                                                |
| UBOX5     | NM_014948 NM_199415                                                      |
| WDSUB1    | NM_152528                                                                |
| BTRC      | NM_003939 NM_033637                                                      |
| CCNF      | NM_001761                                                                |
| FBXL10    | NM_001005366 NM_032590                                                   |
| FBXL11    | NM_012308                                                                |
| FBXL12    | NM_017703                                                                |
| FBXL13    | NM_145032                                                                |
| FBXL14    | NM_152441                                                                |

|        |                                            |
|--------|--------------------------------------------|
| FBXL15 | NM_024326                                  |
| FBXL16 | NM_153350                                  |
| FBXL18 | NM_024963                                  |
| FBXL2  | NM_012157                                  |
| FBXL20 | NM_032875                                  |
| FBXL3  | NM_012158                                  |
| FBXL4  | NM_012160                                  |
| FBXL5  | NM_012161 NM_033535                        |
| FBXL6  | NM_012162 NM_024555                        |
| FBXL7  | NM_012304                                  |
| FBXL8  | NM_018378                                  |
| FBXW11 | NM_012300 NM_033644 NM_033645              |
| FBXW2  | NM_012164                                  |
| FBXW4  | NM_022039                                  |
| FBXW5  | NM_018998                                  |
| FBXW7  | NM_001013415 NM_018315 NM_033632           |
| FBXW8  | NM_012174 NM_153348                        |
| FBXO10 | NM_012166                                  |
| FBXO11 | NM_012167 NM_018693 NM_025133              |
| FBXO15 | NM_152676                                  |
| FBXO16 | NM_172366                                  |
| FBXO17 | NM_024907 NM_148169                        |
| FBXO2  | NM_012168                                  |
| FBXO21 | NM_015002 NM_033624                        |
| FBXO22 | NM_012170 NM_147188                        |
| FBXO24 | NM_012172 NM_033506                        |
| FBXO25 | NM_012173 NM_183420 NM_183421              |
| FBXO27 | NM_178820                                  |
| FBXO28 | NM_015176                                  |
| FBXO3  | NM_012175 NM_033406                        |
| FBXO30 | NM_032145                                  |
| FBXO31 | NM_024735                                  |
| FBXO32 | NM_058229 NM_148177                        |
| FBXO33 | NM_203301                                  |
| FBXO34 | NM_017943                                  |
| FBXO36 | NM_174899                                  |
| FBXO38 | NM_030793 NM_205836                        |
| FBXO4  | NM_012176 NM_033484                        |
| FBXO40 | NM_016298                                  |
| FBXO41 | NM_001080410                               |
| FBXO42 | NM_018994                                  |
| FBXO44 | NM_001014765 NM_033182 NM_183412 NM_183413 |
| FBXO45 | XM_931557 XM_946180                        |
| FBXO46 | NM_001080469                               |
| FBXO5  | NM_012177                                  |
| FBXO6  | NM_018438                                  |

|              |                               |
|--------------|-------------------------------|
| FBXO7        | NM_001033024 NM_012179        |
| FBXO8        | NM_012180                     |
| FBXO9        | NM_012347 NM_033480 NM_033481 |
| FBXO18       | NM_032807 NM_178150           |
| LRRC29       | NM_001004055 NM_012163        |
| RP3-509I19.5 | NM_001077706                  |
| SKP2         | NM_005983 NM_032637           |
| TCEB3        | NM_003198                     |
| ASB10        | NM_080871                     |
| ASB11        | NM_001012428 NM_080873        |
| ASB13        | NM_024701                     |
| ASB14        | NM_130387                     |
| ASB15        | NM_080928                     |
| ASB16        | NM_080863                     |
| ASB17        | NM_080868                     |
| ASB18        | NM_212556                     |
| ASB2         | NM_016150                     |
| ASB3         | NM_016115 NM_145863           |
| ASB4         | NM_016116 NM_145872           |
| ASB5         | NM_080874                     |
| ASB6         | NM_017873 NM_177999           |
| ASB7         | NM_024708 NM_198243           |
| ASB8         | NM_024095                     |
| ASB9         | NM_001031739 NM_024087        |
| CISH         | NM_145071                     |
| NEURL2       | NM_080749                     |
| RAB40A       | NM_080879                     |
| RAB40B       | NM_006822                     |
| RAB40C       | NM_021168                     |
| LOC286526    | NM_001031834                  |
| SPSB1        | NM_025106                     |
| SPSB2        | NM_032641                     |
| SPSB3        | NM_080861                     |
| SPSB4        | NM_080862                     |
| SOCS1        | NM_003745                     |
| SOCS2        | NM_003877                     |
| SOCS3        | NM_003955                     |
| SOCS4        | NM_080867 NM_199421           |
| SOCS5        | NM_014011 NM_144949           |
| SOCS6        | NM_004232                     |
| SOCS7        | NM_014598                     |
| TULP4        | NM_001007466 NM_020245        |
| VHL          | NM_000551 NM_198156           |
| WSB1         | NM_015626 NM_134265           |
| WSB2         | NM_018639                     |
| ABTB1        | NM_032548 NM_172027 NM_172028 |

|           |                                     |
|-----------|-------------------------------------|
| ABTB2     | NM_145804                           |
| ANKFY1    | NM_016376 NM_020740                 |
| ARMC5     | NM_024742                           |
| BCL6      | NM_001706 NM_138931                 |
| BCL6B     | NM_181844                           |
| BTBD1     | NM_001011885 NM_025238              |
| BTBD10    | NM_032320                           |
| BTBD11    | NM_001017523 NM_001018072 NM_152322 |
| BTBD12    | NM_032444                           |
| BTBD14A   | NM_144653                           |
| BTBD14B   | NM_052876                           |
| BTBD2     | NM_017797                           |
| BTBD3     | NM_014962 NM_181443                 |
| BTBD6     | NM_033271                           |
| BTBD7     | NM_001002860 NM_018167              |
| BTBD8     | NM_183242                           |
| BTBD9     | NM_152733                           |
| BACH1     | NM_001011545 NM_001186 NM_206866    |
| BACH2     | NM_021813                           |
| CCIN      | NM_005893                           |
| C16orf44  | NM_024731                           |
| ENC1      | NM_003633                           |
| LOC388419 | NM_001080466                        |
| GZF1      | NM_022482                           |
| GMCL1     | NM_178439                           |
| GAN       | NM_022041                           |
| HIC1      | NM_001098202 NM_006497              |
| HIC2      | NM_015094                           |
| LOC339745 | NM_001001664                        |
| C8ORFK36  | NM_001081675                        |
| MGC23270  | NM_152646                           |
| IVNS1ABP  | NM_016389 NM_006469                 |
| IBTK      | NM_015525                           |
| IPP       | NM_005897                           |
| KCNRG     | NM_173605 NM_199464                 |
| KCTD1     | NM_198991                           |
| KCTD10    | NM_031954                           |
| KCTD12    | NM_138444                           |
| KCTD13    | NM_178863                           |
| KCTD14    | NM_023930                           |
| KCTD15    | NM_024076                           |
| KCTD16    | NM_020768                           |
| KCTD17    | NM_024681                           |
| KCTD2     | NM_015353                           |
| KCTD20    | NM_173562                           |
| KCTD21    | NM_001029859                        |

|         |                                  |
|---------|----------------------------------|
| KCTD3   | NM_016121                        |
| KCTD4   | NM_198404                        |
| KCTD5   | NM_018992                        |
| KCTD6   | NM_153331                        |
| KCTD7   | NM_153033                        |
| KCTD8   | NM_198353                        |
| KCTD9   | NM_017634                        |
| KCNV1   | NM_014379                        |
| KCNS1   | NM_002251                        |
| KCNS2   | NM_020697                        |
| KCNS3   | NM_002252                        |
| KCNB1   | NM_004975                        |
| KCNB2   | NM_004770                        |
| KCNA1   | NM_000217                        |
| KCNA10  | NM_005549                        |
| KCNA2   | NM_004974                        |
| KCNA3   | NM_002232                        |
| KCNA4   | NM_002233                        |
| KCNA5   | NM_002234                        |
| KCNA6   | NM_002235                        |
| KCNA7   | NM_031886                        |
| KCND1   | NM_004979                        |
| KCND2   | NM_012281                        |
| KCND3   | NM_004980 NM_172198              |
| KCNC1   | NM_004976                        |
| KCNC2   | NM_139136 NM_139137 NM_153748    |
| KCNC3   | NM_004977                        |
| KCNC4   | NM_001039574 NM_004978 NM_153763 |
| KCNG1   | NM_002237 NM_172318              |
| KCNG3   | NM_133329 NM_172344              |
| KLHDC5  | NM_020782                        |
| KLHDC6  | NM_207335                        |
| KBTBD10 | NM_006063                        |
| KBTBD11 | NM_014867                        |
| KBTBD2  | NM_015483                        |
| KBTBD3  | NM_152433 NM_198439              |
| KBTBD4  | NM_016506 NM_018095              |
| KBTBD5  | NM_152393                        |
| KBTBD6  | NM_152903                        |
| KBTBD7  | NM_032138                        |
| KBTBD8  | NM_032505                        |
| KLHL1   | NM_020866                        |
| KLHL10  | NM_152467                        |
| KLHL11  | NM_018143                        |
| KLHL12  | NM_021633                        |
| KLHL13  | NM_033495                        |

|           |                                                                           |
|-----------|---------------------------------------------------------------------------|
| KLHL14    | NM_020805                                                                 |
| KLHL15    | NM_030624                                                                 |
| KLHL17    | NM_198317                                                                 |
| KLHL18    | NM_025010                                                                 |
| KLHL20    | NM_014458                                                                 |
| KLHL21    | NM_014851                                                                 |
| KLHL22    | NM_032775                                                                 |
| KLHL23    | NM_144711                                                                 |
| KLHL24    | NM_017644                                                                 |
| KLHL25    | NM_022480                                                                 |
| KLHL26    | NM_018316                                                                 |
| KLHL28    | NM_017658                                                                 |
| KLHL29    | XM_001134449 XM_940375                                                    |
| KLHL3     | NM_017415                                                                 |
| KLHL30    | NM_198582                                                                 |
| KLHL31    | NM_001003760                                                              |
| KLHL32    | NM_052904                                                                 |
| KLHL34    | NM_153270                                                                 |
| KLHL4     | NM_019117 NM_057162                                                       |
| KLHL5     | NM_001007075 NM_015990 NM_199039                                          |
| KLHL6     | NM_130446                                                                 |
| KLHL7     | NM_001031710 NM_018846                                                    |
| KLHL8     | NM_020803                                                                 |
| KLHL9     | NM_018847                                                                 |
| KEAP1     | NM_012289 NM_203500                                                       |
| LGALS3BP  | NM_005567                                                                 |
| LZTR1     | NM_006767                                                                 |
| MYNN      | NM_018657                                                                 |
| PATZ1     | NM_014323 NM_032050 NM_032051 NM_032052                                   |
| RCBTB1    | NM_018191                                                                 |
| RCBTB2    | NM_001268                                                                 |
| RHOBTB1   | NM_001032380 NM_014836 NM_198225                                          |
| RHOBTB2   | NM_015178                                                                 |
| RHOBTB3   | NM_014899                                                                 |
| SHKBP1    | NM_138392                                                                 |
| LOC123103 | XM_063481                                                                 |
| SPOP      | NM_001007226 NM_001007227 NM_001007228 NM_001007229 NM_001007230 NM_00356 |
| TNFAIP1   | NM_021137                                                                 |
| ZBTB1     | NM_014950                                                                 |
| ZBTB10    | NM_023929                                                                 |
| ZBTB11    | NM_014415                                                                 |
| ZBTB12    | NM_181842                                                                 |
| ZBTB16    | NM_001018011 NM_006006                                                    |
| ZBTB17    | NM_003443                                                                 |
| ZBTB2     | NM_020861                                                                 |
| ZBTB20    | NM_015642                                                                 |

|          |                                                  |
|----------|--------------------------------------------------|
| ZBTB22   | NM_005453                                        |
| ZBTB24   | NM_014797                                        |
| ZBTB25   | NM_006977                                        |
| ZBTB26   | NM_020924                                        |
| ZBTB3    | NM_024784                                        |
| ZBTB32   | NM_014383                                        |
| ZBTB33   | NM_006777                                        |
| ZBTB37   | NM_032522                                        |
| ZBTB38   | NM_001080412                                     |
| ZBTB39   | NM_014830                                        |
| ZBTB4    | NM_020899                                        |
| ZBTB40   | NM_001083621 NM_014870                           |
| ZBTB41   | NM_194314                                        |
| ZBTB43   | NM_014007                                        |
| ZBTB44   | NM_014155                                        |
| ZBTB45   | NM_032792                                        |
| ZBTB46   | NM_025224                                        |
| ZBTB48   | NM_005341                                        |
| ZBTB5    | NM_014872                                        |
| ZBTB6    | NM_006626                                        |
| ZBTB7A   | NM_015898                                        |
| ZBTB7B   | NM_015872                                        |
| ZBTB7C   | NM_001039360                                     |
| ZBTB8    | NM_001040441                                     |
| ZBTB9    | NM_152735                                        |
| ZNF131   | NM_003432                                        |
| ZFP161   | NM_003409                                        |
| ZNF238   | NM_006352 NM_205768                              |
| ZNF295   | NM_001098402 NM_001098403 NM_020727              |
| ZNF509   | NM_145291                                        |
| FLJ30092 | XM_497354 XM_942665                              |
| HACE1    | NM_020771                                        |
| HERC1    | NM_003922                                        |
| HERC2    | NM_004667                                        |
| HERC3    | NM_014606                                        |
| HERC4    | NM_001017972 NM_015601 NM_022079                 |
| HERC5    | NM_016323                                        |
| HERC6    | NM_001013000 NM_001013002 NM_001013005 NM_017912 |
| HECTD1   | NM_015382                                        |
| HECTD2   | NM_173497 NM_182765                              |
| HECTD3   | NM_024602                                        |
| HECW1    | NM_015052                                        |
| HECW2    | NM_020760                                        |
| HUWE1    | NM_031407                                        |
| UBE3A    | NM_000462 NM_130838 NM_130839                    |
| ITCH     | NM_031483                                        |



|          |                               |
|----------|-------------------------------|
| KIAA0317 | NM_001039479                  |
| KIAA1333 | NM_017769                     |
| NEDD4    | NM_006154 NM_198400           |
| NEDD4L   | NM_015277                     |
| SMURF1   | NM_020429 NM_181349           |
| SMURF2   | NM_022739                     |
| TRIP12   | NM_004238                     |
| UBR5     | NM_015902                     |
| UBE3B    | NM_130466 NM_183415           |
| UBE3C    | NM_014671                     |
| WWP1     | NM_007013                     |
| WWP2     | NM_007014 NM_199423 NM_199424 |
| CPSF1    | NM_013291                     |
| DDB1     | NM_001923                     |
| SF3B3    | NM_012426                     |
| ANUBL1   | NM_174890                     |
| OTUD7A   | NM_130901                     |
| OTUD7B   | NM_020205                     |
| KCTD7    | NM_153033                     |
| RABGEF1  | NM_014504                     |
| TNFAIP3  | NM_006290                     |
| ZFAND3   | NM_021943                     |
| ZFAND5   | NM_006007                     |
| ZFAND6   | NM_019006                     |

**Supplementary Table 2:** List of genes for which multiple shRNAs were isolated from the RNAi screen.

| <b>Gene Symbol</b>   | <b>Gene Name</b>                                                  | <b>Protein family</b>                         |
|----------------------|-------------------------------------------------------------------|-----------------------------------------------|
| <i><b>MARCH1</b></i> | Membrane-associated ring finger (C3HC4) 1                         | MARCH                                         |
| <i><b>MARCH9</b></i> | Membrane-associated ring finger (C3HC4) 9                         | MARCH                                         |
| <i><b>NHLRC1</b></i> | NHL repeat containing E3 ubiquitin protein ligase 1               |                                               |
| <i><b>KCNB1</b></i>  | Potassium voltage-gated channel, Shab-related subfamily, member 1 | Potassium voltage-gated channel, Shab-related |
| <i><b>RNFT1</b></i>  | Ring finger protein, transmembrane 1                              |                                               |
| <i><b>RNF166</b></i> | Ring finger protein 166                                           |                                               |
| <i><b>DTX3L</b></i>  | Deltex 3-like (Drosophila)                                        | DELTEX                                        |

**Supplementary Table 3.** Primers were used for qRT-PCR analysis, ChIP experiments, and cloning. The antibodies were used as indicated. The source and concentrations of chemical inhibitors and biologics used for drug treatment experiments are summarized.

| Application | Gene symbol | Species | Forward Primer (5'-3')   | Reverse Primer (5'-3')    |
|-------------|-------------|---------|--------------------------|---------------------------|
| qPCR        | MARCH1      | Human   | GCCTCACAAACCT<br>CCACATT | TCTGCAGATGTCCTGAG<br>TGG  |
|             | MARCH9      | Human   | TGGAGCTGTGAGC<br>TCTGCTA | CTGAAGGGCTGAGTGAG<br>GAC  |
|             | NHLRC1      | Human   | GTCACCATCACCA<br>ACGACTG | TCTCCACACCCCAAGGT<br>AAG  |
|             | KCNB1       | Human   | TGCCAGTGGTGGT<br>AGGTTTG | GAGGAGTGGACTGGGGT<br>CAC  |
|             | RNF166      | Human   | GAAGGTCCAGGA<br>GCAGATGG | TGGCTTTCCACACAGTG<br>CTT  |
|             | RNFT1       | Human   | ATGCCTCAACCCC<br>TCAGTGT | GAGTGACCCCGTAAGCG<br>ACT  |
|             | DTX3L       | Human   | TGTCCACATGCC<br>AGACTTC  | TTTCTGGGTTTGGGTGT<br>TC   |
|             | ACTIN       | Human   | GCATGGAGTCCTG<br>TGGCATC | TTCTGCATCCTGTCGGCA<br>AT  |
|             | MARCH1      | Mouse   | CAGATGACCACGA<br>GCGAAAG | AAGACGAGACCTCCCGT<br>GAA  |
|             | MARCH9      | Mouse   | GTGACGTTCCAGT<br>TCCCACA | TCTGGCATTGGTCTCCCT<br>TT  |
|             | NHLRC1      | Mouse   | GTCACCAACGACT<br>GCCATGT | GCCTCTGCATCAGTCAC<br>CAG  |
|             | KCNB1       | Mouse   | GATGGCCAAGACC<br>CAGTCTC | GCTGATGAAGCTGTCTGA<br>TGC |
|             | RNF166      | Mouse   | GTGAAGCACTGCG<br>TGAAAG  | CTGGAAGGCAGCTTCTT<br>CGT  |
|             | RNFT1       | Mouse   | CCCACAGTGAAGC<br>AAGACCA | AGCAGCCCAATTCCAAG<br>AGA  |
|             | DTX3L       | Mouse   | GCATCCAGAAAGG<br>GAACCAG | TCGCCGTGTTCCATGATA<br>AG  |
|             | ACTIN       | Mouse   | AGGCTCTTTTCCA<br>GCCTTCC | GTCAGCAATGCCTGGGT<br>ACA  |
|             | MARCH1      | Rat     | ACAGGAACCTTGC<br>GCTTTGT | CTTTCGCTCGTGGTCATC<br>TG  |
|             | FOXO1       | Human   | GAGCAGCTGCAAT<br>GGCTATG | TGTGTGGGAAGCTTTGG<br>TTG  |
|             | CBL         | Human   | GAGGCCATGGCTC<br>TGAAATC | AGCCGAGCTTTCCTTC<br>GTC   |
|             | NEDD4       | Human   | CCACCAGGTTGGG<br>AAGAAAA | ACCTGCTGGCCTGAATC<br>ACT  |
| ChIP        |             |         |                          |                           |

|                     |                                  |                 |                                                                              |                                                     |
|---------------------|----------------------------------|-----------------|------------------------------------------------------------------------------|-----------------------------------------------------|
|                     | MARCH1                           | Human           | TTGAGGTCCCCTC<br>GTTGTTT                                                     | TGGCTGCTCAGTAGCTC<br>AGG                            |
| <b>Cloning</b>      |                                  |                 |                                                                              |                                                     |
| Luciferase reporter | MARCH1 promoter                  | Human           | ATGCGGTACCGCT<br>GAATATTACTCCA<br>TTGT                                       | ATGCGTCGACTGACATC<br>TCTCGCCCAGGAG                  |
| AAV                 | MARCH1                           | Mouse           | AGCGGATCCACCA<br>TGGATTACAAGGA<br>TGACGATGACAAG<br>ATGCTGGGCTGGT<br>GTGAAGCG | TCAGACTGATACAACTT<br>CAGG                           |
| <b>Mutagenesis</b>  |                                  |                 |                                                                              |                                                     |
|                     | MARCH1 promoter                  |                 | CTCAGACTCCCGC<br>CTGTACCAGTACA<br>CATCTTTCTCCCT                              | AGGGAGAAAGATGTGTA<br>CTGGGTACAGGCGGGAG<br>TCTGAG    |
|                     | INSR K1079R                      |                 | AATGAGGCTCGG<br>TCATGAGGGGCTT<br>CACCTGCCATCAC<br>GTG                        | CACGTGATGGCAGGTGA<br>AGCCCTCATGACCGAG<br>GCCTCATT   |
|                     | MARCH1 Transmembrane I Deletion  |                 | ATAATGGAGACCA<br>AGCTCAAATTCAT<br>AATGGAGACCAA<br>GCTC                       | GAGCTTGGTCTCCATTAT<br>GAATTTGAGCTTGGTCTC<br>CATTAT  |
|                     | MARCH1 Transmembrane II Deletion |                 | TTGTATGTATTGA<br>TAGACCGGGTGGT<br>AGCCATTGGCTTC<br>ACA                       | TGTGAAGCCAATGGCTA<br>CCACCCGGTCTATCAAT<br>ACATACAA  |
|                     | MARCH1 shRNA#1 resistant cDNA    |                 | AATATTCTGTTCC<br>GTTACCTTTCATG<br>TAATCGCGATCAC<br>CT                        | AGGTGATCGCGATTACA<br>TGAAAGGTAACGGAACA<br>GAATATT   |
|                     | MARCH1 shRNA#2 resistant cDNA    |                 | GGAAAAAAGTA<br>AAATCTCCACTAT<br>GTACTACCTTAAC<br>CAAGA                       | TCTTGGTTAAGGTAGTA<br>CATAGTGGAGATTTTAC<br>TTTTTTTCC |
|                     | <b>Protein symbol</b>            | <b>Species</b>  | <b>Antibody, Cat. #</b>                                                      | <b>Application</b>                                  |
|                     | AKT                              | Human,<br>Mouse | Cell Signaling #4685                                                         | IB                                                  |
|                     | AKT pS473                        | Human,<br>Mouse | Cell Signaling #4060                                                         | IB                                                  |
|                     | INSR $\alpha$                    | Human,<br>Mouse | Santa Cruz #sc-710                                                           | IB                                                  |
|                     | INSR $\alpha$                    | Human,<br>mouse | Pierce #83-14                                                                | Flow Cytometry                                      |
|                     | INSR $\beta$                     | Human,<br>Mouse | Cell Signaling #3025                                                         | IP, IB                                              |

|  |                                 |                     |                         |        |
|--|---------------------------------|---------------------|-------------------------|--------|
|  | INSR $\beta$                    | Human,<br>Mouse     | Cell Signaling #3020    | IP, IB |
|  | INSR $\beta$                    | Human,<br>Mouse     | Santa Cruz #sc-711      | IP, IB |
|  | IRS1                            | Human,<br>Mouse     | Santa Cruz #sc-559      | IP, IB |
|  | $\beta$ -Actin                  | Human,<br>Mouse     | Cell Signaling #3700    | IB     |
|  | INSR pY1158                     | Human,<br>Mouse     | Cell Signaling #3021    | IB     |
|  | Na-K ATPase                     | Human,<br>Mouse     | Abcam<br>#ab7671        | IB     |
|  | pTyr                            | Human,<br>Mouse     | Cell Signaling #8954    | IB     |
|  | MARCH1                          | Mouse               | Sigma #3D2              | IB     |
|  | MYC epitope                     | n/a                 | Santa Cruz #sc-40       | IB     |
|  | GFP                             | n/a                 | Cell Signaling<br>#2956 | IB     |
|  | GFP                             | n/a                 | Cell Signaling<br>#2955 | IB     |
|  | GFP                             | n/a                 | Santa Cruz #sc-8334     | IP, IB |
|  | Flotillin-2                     | Human               | Cell Signaling<br>#3436 | IB     |
|  | Caveolin-1                      | Human               | Cell Signaling<br>#3267 | IB     |
|  | Calnexin                        | Human               | Abcam<br>#22595         | IB     |
|  | FoxO1                           | Human               | Cell Signaling #2880    | ChIP   |
|  | Ubiquitin                       | Multiple<br>species | Biomol #PW8810          | IP, IB |
|  | HA-Tag                          | n/a                 | Cell signaling #3724    | IP, IB |
|  | <b>Inhibitor</b>                |                     | <b>Source</b>           |        |
|  | Cycloheximide                   | 100 $\mu$ g/ml      | Sigma #C1988            |        |
|  | Cytochalasin B                  | 5 $\mu$ M           | Sigma #C6762            |        |
|  | PTP1B inhibitor                 | 10 $\mu$ M          | Calbiochem #539749      |        |
|  | Dynasore                        | 20 $\mu$ M          | Calbiochem # 324410     |        |
|  | <b>Chemicals<br/>/Biologics</b> |                     |                         |        |
|  | Apo Transferrin                 | 5 $\mu$ g/ml        | Sigma #T1147            |        |
|  | Dexamethasone                   | 0.25 $\mu$ M        | Sigma #D4902            |        |
|  | EGF                             | 50 ng/ml            | Sigma #E9644            |        |
|  | FGF                             | 10 ng/ml            | Sigma #SRP3043          |        |
|  | Fibronectin                     | 0.5 $\mu$ g/ml      | Sigma, #F1141           |        |
|  | Hydrocortisone                  | 100nM               | Sigma #H0888            |        |
|  | Insulin                         | 0.05 $\mu$ g/ml     | Sigma #D4902            |        |

|  |                          |           |                      |  |
|--|--------------------------|-----------|----------------------|--|
|  |                          |           |                      |  |
|  | Isobutylmethylxanthine   | 0.5 mM    | Sigma #I7018         |  |
|  | <i>N</i> -ethylmaleimide | 2mM       | Sigma #3876          |  |
|  | Selenium                 | 5ng/ml    | Sigma #S5261,        |  |
|  | USP2                     | 1 $\mu$ M | Boston Biochem #E506 |  |

**Supplementary Table 4. shRNA IDs for the shRNAs used in this study**

| Gene Name | Species | shRNA IDs      |                |
|-----------|---------|----------------|----------------|
|           |         | shRNA#1        | shRNA#2        |
| MARCH1    | Human   | TRCN0000037019 | TRCN0000037022 |
| MARCH9    | Human   | TRCN0000073170 | TRCN0000073171 |
| NHLRC1    | Human   | TRCN0000034184 | TRCN0000034186 |
| KCNB1     | Human   | TRCN0000044783 | TRCN0000044785 |
| RNF166    | Human   | TRCN0000007801 | TRCN0000007803 |
| RNFT1     | Human   | TRCN0000034332 | TRCN0000034333 |
| DTX3L     | Human   | TRCN0000073208 | TRCN0000073210 |
| FOXO1     | Human   | TRCN0000039578 | TRCN0000010333 |
| CBL       | Human   | TRCN0000039723 | TRCN0000039724 |
| NEDD4     | Human   | TRCN0000007553 | TRCN0000007554 |
| March1    | Mouse   | V3LMM_461750   | TRCN0000176313 |
